Bilgic et al\_2022.docx

## Single cell transcriptomics of ferrets reveal a common temporal pattern of progenitors in brain development of gyrencephalic mammals

### Authors list

Merve Bilgic<sup>1,2,3</sup>, Quan Wu<sup>1\*</sup>, Taeko Suetsugu<sup>1</sup>, Yuji Tsunekawa<sup>1,4</sup>, Atsunori Sitamukai<sup>1</sup>, Mitsutaka Kadota<sup>5</sup>, Osamu Nishimura<sup>5</sup>, Shigehiro Kuraku<sup>5,6</sup>, and Fumio Matsuzaki<sup>1,2,\*</sup>

### Affiliations

<sup>1</sup>Laboratory for Cell Asymmetry, RIKEN Center for Biosystems Dynamics Research, Kobe, Hyogo 650-0047, Japan.

<sup>2</sup>Laboratory of Molecular Cell Biology and Development, Department of Animal Development and Physiology, Graduate School for Biostudies, Kyoto University, Kyoto 606-8501, Japan.

<sup>3</sup>Present address: The Institute for Quantitative Biosciences, The University of Tokyo, Tokyo 113-0033, Japan.

<sup>4</sup>Present address: Division of Molecular and Medical Genetics, Center for Gene and Cell Therapy, The Institute for Medical Science, The University of Tokyo, Tokyo 108-0071, Japan.

<sup>5</sup>Laboratory for Phyloinformatics, RIKEN Center for Biosystems Dynamics Research, Kobe, Hyogo 650-0047, Japan.

<sup>6</sup>Present address: Molecular Life History Laboratory, Department of Genomics and Evolutionary Biology, National Institute of Genetics, Mishima, Shizuoka 411-8540, Japan.

\*Corresponding authors

[quan.wu@riken.jp](mailto:quan.wu@riken.jp)

[fumio.matsuzaki@riken.jp](mailto:fumio.matsuzaki@riken.jp)

Further information and requests for resources and reagents should be directed to and will be fulfilled by the lead contact, Fumio Matsuzaki ([fumio.matsuzaki@riken.jp](mailto:fumio.matsuzaki@riken.jp))

## 1 SUMMARY

2 The diversity of neural stem cells is a hallmark of gyrencephalic brains, including that in  
3 humans. Ferrets are an excellent model to study the complex brain development in  
4 gyrencephalic mammals, but information on their neural progenitor subtypes is fragmentary.  
5 Here, we investigated the temporal series of single-cell transcriptomes of progenitors in  
6 developing cortices in ferrets for comparison with human datasets. We found that the diversity  
7 and temporal trajectory of neural progenitors, termed radial glia (RG), are well conserved  
8 between ferrets and humans. Truncated RG (tRG), a progenitor subtype previously described  
9 in humans, and outer RG-like cells were assigned to ferret transcriptomes. *In vivo* and  
10 transcriptome analyses indicated that ferret tRG are generated via asymmetric RG divisions  
11 during late neurogenesis, and suggested that tRG is eventually fated to ependymal and glial  
12 populations. Therefore, the combined analyses of human and ferret transcriptomes enable the  
13 determination of progenitor fate sequences *in vivo*.

14

### 15 **Keywords:**

16 **Single-cell transcriptome, neural stem cell, brain development, ferret, human,**  
17 **neurogenesis, truncated radial glia**

18

## 19 INTRODUCTION

20 A vast diversity of neurons and glia form functional neural circuits during the development of  
21 the cerebral cortex to dictate its elaborated tasks in mammals. These cells are progressively  
22 derived from multipotent neural stem cells, called radial glia (RG), which generate neurons of  
23 the deep layers (DL) and upper layers (UL), and subsequently undergo gliogenesis to generate  
24 astrocytes and/or oligodendrocytes (Figure 1A, Rowitch and Kriegstein, 2010). During this  
25 process, RG division at the ventricular zone (VZ) generates terminally differentiated cells or  
26 intermediate progenitor cells (IPC) that are mitotically active to generate differentiated cells in  
27 the VZ or sub-VZ (SVZ). Therefore, the spatiotemporal patterns of neural progenitor cells  
28 (NPC), including RG and IPC, are crucial for constructing the functional architecture of six  
29 neuronal layers in the cerebral cortex (Rossi et al., 2017).

30

31 The cerebral cortex has undergone great expansion during mammalian evolution, often leading  
32 to surface folding. One of the crucial factors is the SVZ expansion, specifically the emergence  
33 of a new germinal layer, the outer SVZ (OSVZ), during cortical development (Smart et al.,  
34 2002). The OSVZ contains outer RG (oRG) cells (Hansen et al., 2010; Fietz et al., 2010) which

35 contribute to the amplification of neuronal and glial outputs in the cortex (Figure 1A; Rash et  
36 al., 2019). Unlike lissencephalic species, the OSVZ grows significantly in gyrencephalic  
37 species, including primates and carnivores such as ferrets (Shitamukai et al., 2011; Wang et al.,  
38 2011; Hansen et al., 2010; Fietz et al., 2010; Reillo et al., 2011). In contrast to bipolar RG cells  
39 in the VZ (vRG), oRG cells are unipolar and have a basal fiber connected to the pial surface  
40 without an apical endfoot (Figure 1A; Fietz et al., 2010; Hansen et al., 2010). A new subtype  
41 of NPC in the VZ has been reported in humans and rhesus macaques (Figure 1A; Nowakowski  
42 et al., 2016, deAzevedo et al., 2003; Sidman and Rakic, 1973), lacking the basal attachment  
43 and is therefore termed truncated RG (tRG). However, whether tRG is formed in a wide range  
44 of gyrencephalic mammals, mechanisms underlying their formation, and their descendants  
45 remain unknown. As distinct subtypes of NPC possess different capacities to generate neuronal  
46 and glial progenies (Rash et al., 2019; Huang and Bhaduri et al., 2020), characterizing their  
47 molecular and cellular properties, mutual relationships during development, and terminal types  
48 of cells they produce are crucial factors.

49

50 Genetic manipulation of individual cell types *in vivo* and single-cell transcriptome analysis are  
51 two major and successful approaches in revealing the properties of cells, such as their  
52 proliferation and differentiation. Single-cell RNA sequencing (scRNA-seq) of the human brain  
53 during development has been extensively performed (Pollen and Nowakowski et al., 2015;  
54 Johnson, Wang and Atabay et al., 2015; Liu et al., 2017; Nowakowski et al., 2017; Zhong and  
55 Zhang et al., 2018; Polioudakis et al., 2019; Bhaduri et al., 2020; Huang et al., 2020; Bhaduri  
56 and Sandoval-Espinosa et al., 2021). However, *in vivo* behavior of human NPC and the  
57 underlying mechanisms remain less explored owing to limited experimental access of the  
58 developing human cortex. Particularly, resources available for the late human embryonic brain  
59 are extremely rare. Studies using brain organoids face issues in recapitulating the specification  
60 and maturation of cell types during human brain development (Bhaduri et al., 2020). In this  
61 context, the ferret (*Mustela putorius furo*) is highlighted as a suitable animal model to  
62 compensate for the difficulties in studying human cortical development. The ferret is a  
63 carnivore that develops common gyrencephalic features, such as the OSVZ and a folded brain,  
64 and is experimentally available for *in vivo* gene manipulation and editing using *in utero*  
65 electroporation (IUE; Kawasaki et al., 2012, Matsui et al., 2013, Tsunekawa et al., 2016).  
66 Severe microcephalic phenotypes in *Aspm* (*Abnormal Spindle-like Microcephaly-associated*)  
67 knockout ferrets with a similar degree to human cases have suggested the use of ferrets for  
68 studying neurodevelopment and disorders of gyrencephalic species (Johnson et al., 2018; Kou

69 and Wu et al., 2015), in contrast to a minor phenotype in mouse *Aspm* mutants (Pulvers et al.,  
70 2010; Fujimori et al., 2014; Capecchi et al., 2015; Jayaraman et al., 2016). Transcriptome  
71 profiling of ferret cortical cells has been performed to reveal regional distinctions in germinal  
72 layers and cell-type composition (de Juan Romera et al., 2015; Johnson et al. 2018). However,  
73 the temporal pattern of molecular signatures of ferret NPC remains largely unexplored at  
74 single-cell resolution. Comparison of progenitor subtypes and sequential events at single-cell  
75 transcriptome levels along the developmental course in ferrets and between the ferrets and  
76 humans will greatly help to recognize common and species-specific mechanisms underlying  
77 the construction of the complex brain.

78

79 In this study, we aimed to comprehensively analyze the developmental dynamics of ferret  
80 progenitor populations both *in vivo* and *in silico* to compare the cortical development between  
81 ferrets and humans at molecular and cellular levels. Transcriptome profiles of ferret cortical  
82 cells were analyzed from different developmental stages that cover the early to-late neurogenic  
83 and gliogenic phases and diverse cell types were identified. The resultant ferret dataset and  
84 published human datasets were integrated for a cross-species comparison that led us to assign  
85 tRG- and oRG-like cells as transcriptionally distinct subpopulations in ferrets. Furthermore,  
86 the combination of *in silico* comparison between ferrets and humans and *in vivo* analysis in  
87 ferrets aided in determining the mode of tRG generation from RG and the fate of their  
88 descendants. The results will promote our understanding of the roles of diverse NPCs in  
89 gyrencephalic animals, emphasizing the values of the current single-cell ferret transcriptomes.

90

## 91 **RESULTS**

### 92 **Temporal patterns of neurogenesis and gliogenesis in ferret cerebral cortex**

93 To visualize the course of neurogenesis and gliogenesis in the developing ferret brain, we  
94 performed immunohistochemistry of the somatosensory cortex at embryonic days E25, E32,  
95 E36, and E40, and postnatal days P5 and P10, covering the developmental events (Figure 1B).  
96 We explored the distribution of RG, IPC, and oligodendrocyte precursors (OPC) by co-staining  
97 for their markers (PAX6, TBR2, and OLIG2, respectively, Figure 1B-G), and the distribution  
98 of astrocytes and their progenitor cells by staining for glial fibrillary acidic protein (GFAP;  
99 Figure S1B). The PAX6<sup>+</sup> RG and TBR2<sup>+</sup> IPC were virtually confined to the VZ and SVZ,  
100 respectively, until E32 (Figure 1B, C). Neurogenesis already commenced at E25 (Figure S1A;  
101 Poluch et al., 2015) and resulted in an enlargement of the TBR2<sup>+</sup> IPC-containing SVZ and

Bilgic et al\_2022.docx

102 expansion of the cortical plate (CP) by E32 (Figure 1C). We confirmed the temporal pattern of  
103 neuronal layer formation in the somatosensory cortex using two markers, CTIP2 (layer V;  
104 Arlotta et al., 2005) and SATB2 (an upper-layer marker; Szemes M *et al*, 2006; Britanova and  
105 Akopov *et al.*, 2005; Figure S1A). During E32, a layer V/VI (CTIP2<sup>+</sup>) was generated  
106 (McConnell, 1988; Noctor et al., 1997). At E36, SATB2<sup>+</sup> neurons were detectable on both the  
107 deeper and upper sides of the CTIP2<sup>+</sup> layer, suggesting the generation and migration of  
108 SATB2<sup>+</sup> upper-layer neurons by E36. Subsequently, GFAP<sup>+</sup> RG with gliogenic potential  
109 emerged by E40, whereas GFAP<sup>+</sup> maturing astrocytes with a typical astrocytic morphology  
110 appeared outside the germinal layers at a much later stage around P5 onward (Figure S1B;  
111 Reillo et al., 2012). The PAX6<sup>+</sup> progenitors started dispersing outside the VZ along the entire  
112 cortex around E32 (Figure 1C), and then formed an OSVZ harboring oRG multipotent  
113 progenitors by E36 (Figure 1D; Fietz et al., 2010; Reillo et al., 2011; Poluch et al., 2015). The  
114 parietal OSVZ expanded the most around birth (Figure 1E) and gradually diminished by P10  
115 (Figure 1F, G). OPCs are derived from RG on the ventral side and the dorsal RG in both mice  
116 (Zheng et al., 2018) and humans (Rash et al., 2019; Huang et al., 2020; Kessar and Fogarty  
117 et al., 2006). We confirmed a similar phenomenon in ferrets (Figure S1C, see also STAR  
118 Methods).

119

## 120 **Single-cell RNA-seq reveals signatures of gene expression and subtypes of ferret cortical** 121 **cells**

122 Despite several transcriptome studies on the ferret cortex (de Juan Romera et al., 2015; Johnson  
123 et al., 2018), incomplete information on the ferret genome (specifically, poor information of  
124 the 3'-untranslated region (UTR) of genes) has interfered with single-cell transcriptome  
125 analysis at a high resolution. We improved the quality of ferret genomic annotation and  
126 constructed new gene models using Chromium by tagging all fragments from a long genomic  
127 DNA in a droplet (Table S1; STAR Methods). We then applied 10X Genomics scRNA-seq  
128 technology to analyze the molecular signatures of neural progenitor subtypes covering early-  
129 to-late neurogenesis and gliogenesis (E25, E34, E40, P1, P5, P10). Cell populations were  
130 isolated by two ways to enrich the progenitor subtypes (Figure 2A): (1) FACS-based sorting  
131 of fluorescent cells from tissues that had been electroporated at E30 or E34 with AzamiGreen  
132 (AG) expression vector (Karasawa et al. 2003) under the control of *Hes5* promoter with a d2  
133 degradation signal (STAR Methods; Ohtsuka et al. 2006) and (2) collecting cells from the VZ,

134 SVZ, and intermediate zones (IZ, Figure 2A) of the cerebral cortex after discarding the CP to  
135 decrease the abundance of mature neurons. These two cell populations were combined for  
136 downstream analyses (STAR Methods). Unbiased clustering was employed based on the  
137 shared nearest neighbors and projected cells in the Uniform Manifold Approximation and  
138 Projection (UMAP) space using Seurat package (Figure 2B, C, Stuart and Butler et al., 2019).  
139 After removing low-quality cells, we characterized 26 transcriptionally distinct clusters from  
140 30,234 ferret cortical cells at different stages and detected up to 2600 median genes per cell  
141 (Figure S2A, B; Table S1). Cell clusters were annotated according to their specific gene  
142 expression patterns (Figure 2D, E, S2D, Table S1) and assigned 10 cell types: RG (early, mid,  
143 and late), IPC, OPC, ependymal cells, excitatory cortical neurons (DL and UL), inhibitory  
144 neurons (ITN), microglia, endothelial cells, mural cells, and a population of unknown cells  
145 (Figure 2D, E). Early and late RG, and IPC were subdivided into three subclusters that  
146 expressed different cell cycle markers (Figure S2C).

147

148 We assigned the early and late RG clusters by their collection stages and the expression of  
149 temporally altered RG markers (hereafter temporal markers) previously reported (*Hmga2*,  
150 *Ldha*, and *Lix1* for early RG, and *Ptn*, *Aldoc*, and *Fabp7* for late RG; Okamoto et al., 2016) as  
151 shown in Figure 2D (see Figure S2D and Table S2). The “early RG” clusters comprised E25  
152 cells; “mid RG” clusters, mostly of E34 cells, and “late RG” groups, with cells from E34 and  
153 later stages (Figure S2E). Therefore, RG clusters were distinguished according to their  
154 sequential transcriptional profiles rather than a sample batch. RG clusters (expressing *Vim*,  
155 *Pax6*, and *Hes5*), IPC (expressing *Eomes*, *Neurod4*, and *Hes6*), and neuronal clusters  
156 (expressing *Stmn2* and *Neurod6*) were aligned according to the neuronal differentiation process  
157 in the UMAP plot (Figure 2C). These changes in the transcriptional profiles of RG along the  
158 temporal and differentiation axes were consistent with the *in vivo* development.

159

160 Interestingly, we identified a small cluster (409 cells) of *Pax6*-expressing RG subtype, 69% of  
161 which expressed *Cryab* (Figure 2F). *Cryab*, encoding a molecular chaperone (Yamamoto et al.,  
162 2014), is a unique marker for human tRG (Figure 2F; Nowakowski et al., 2016); therefore, we  
163 designated them as tRG-like cells in ferrets. In contrast, oRG cells were not identified as  
164 distinct clusters from vRG cells in ferrets by unbiased clustering (Figure 2B, G). A typical *in*  
165 *vivo* example is that HOPX, a good marker for oRG in human tissues (Pollen et al., 2015). is  
166 expressed in both oRG and vRG (Figure 2H; Kawaue et al., 2019; Johnson et al., 2018).

167

168 **The radial-glia subtypes in ferrets correlate with their human counterparts**

169 Both ferrets and humans represent complex brain features of gyrencephalic mammals and are  
170 located in distinct phylogenetic branches. Therefore, comparing RG subtypes and their temporal  
171 patterns of birth, transitions, and differentiation is beneficial to distinguish the developmental  
172 processes specific to a particular species or common for complex brain formation. We  
173 successfully compared them at the single-cell transcriptome level using our ferret dataset and  
174 a previously published human dataset (Nowakowski *et al.*, 2017).

175 We used a published package (Seurat) to integrate the ferret dataset with human dataset,  
176 including all types of cells obtained from the somatosensory cortex. The two datasets were  
177 merged using pairs of cells with the most similar biological states. Each pair containing one  
178 human and one ferret cell, was identified by the mutual nearest neighbors (MNNs) after  
179 Canonical Correlation Analysis (CCA) of two datasets (Stuart and Butler *et al.*, 2019; See  
180 STAR Methods).

181 This computation revealed that various cell types, including RG, IPC, OPC, neurons, mural  
182 cells, endothelial cells, and microglial cells, were clustered together across datasets (Figure 3A,  
183 S3A). The cell-type composition from both species was similar across ages; on the UMAP plot,  
184 ferret E25 cells were closely distributed with their counterparts human GW8; ferret E34 with  
185 human GW11-14; ferret E40-P1 with human GW15-16, and ferret P5-P10 with human GW17-  
186 22 (Figure 3B), suggesting that these pairs corresponded to each other. Consistently with our  
187 *in vivo* observations in ferrets (Figure 1, S1), gliogenic RG cells (a subtype of “late\_RG” group  
188 and OPC in Figure 2B) were first distinguished transcriptionally at E40 in the ferret and at  
189 GW14 in human datasets (arrowheads in Figure 3B).

190  
191 Next, we compared the similarities among RG subtypes in humans and ferrets. To quantify the  
192 features of an RG subtype, we introduced a parameter, marker-gene score (Bhaduri *et al.*, 2020),  
193 which is used to describe the expression pattern (degree of abundance and specificity) of a  
194 marker gene in a given cluster; the score for a marker gene is defined by multiplying the  
195 average enrichment of expression level in the cluster (fold change) and the ratio of the number  
196 of cells expressing the marker in the cluster to that in all other clusters (see STAR Methods).  
197 We hypothesized that if two cell clusters from two different species belong to the same cell  
198 type, they should share similar marker genes and each marker gene should have a similar score.  
199 We evaluated the correlation between two arbitrary RG subtypes from humans and ferrets by  
200 calculating the marker-gene scores for a set of cluster marker genes, the expression of which  
201 was shared by the pair of RG subtypes of interest (Table S2). The early and late RG clusters

202 were found to be related across species with a significantly high similarity (Figure 3C, D); the  
203 early RG clusters in ferrets were highly correlated with those of humans, and the late RG  
204 clusters in ferrets were similar to human vRG, oRG, and tRG. The correlation of the  
205 transcriptome profile between ferret tRG-like cells and human tRG was significantly high.  
206 Ferret tRG-like clusters and human tRG clusters expressed *Cryab*, *Egr1*, *Cyr61*, and *Sparc* at  
207 higher levels than did the other RG clusters (Figure 3E), confirming that these genes are the  
208 global tRG markers shared by ferrets and humans.

209

210 Marker gene scores can also be used to determine the correlation between cell clusters of two  
211 species (e.g., ferrets and humans) based on the assumption that cells belonging to a specific  
212 subtype should highly and specifically express the marker genes. Therefore, we defined the  
213 cluster score for a cell as a linear combination of the expression level of each marker gene in  
214 the cell weighted by its marker-gene score in the human cluster of interest. We separately  
215 calculated the tRG score for all RG cells in the ferret and human datasets. Expectedly, tRG-  
216 like cells had a significantly higher tRG cluster score than any other cluster in the ferret and  
217 human datasets (Figure 3F). Considering that the tRG score for ferret cells was calculated using  
218 marker-gene scores of the human tRG cluster, we concluded that tRG-like cells in ferrets share  
219 transcriptomic profiles similar with human tRG cells.

220

### 221 **tRG emerge around birth during the development of somatosensory cortex in ferrets**

222 Finding tRG-like clusters in ferret transcriptome suggests the presence of RG-like cells with  
223 short fibers in the ferret cortex at late neurogenic stages, which is similar to the human brain.  
224 We then investigated how and when such RG cells emerged in developing cortical tissues of  
225 ferrets. To visualize tRG-like cell morphology, we sparsely electroporated late-embryonic and  
226 newborn ferrets with an expression vector for enhanced green fluorescent protein (EGFP, see  
227 STAR Methods). EGFP labeling at P0 revealed RG cells with a truncated basal fiber and apical  
228 endfoot (Figure 4A), as previously reported in human tissues (Nowakowski et al., 2016).

229

230 tRG cells emerge and express CRYAB during late neurogenic and early gliogenic stages  
231 (Nowakowski et al., 2016). Similarly, in ferret tRG-like cells *in vivo*, CRYAB expression  
232 emerged shortly prior to birth, at the late neurogenic and early gliogenic stages (Figure S4F)  
233 and became mostly restricted to tRG-shaped cells in the VZ and SVZ (Figure 4B, S4B-D).  
234 These cells increased in number by P10 (Figure 4C). These histochemical observations were  
235 in accordance with our transcriptome data; the population of ferret tRG-like cells increased



236 during late development (Figure 4D) with the majority becoming *Cryab*<sup>+</sup> (Figure S4E).  
237 Meanwhile, only 5% of RG at the late stage expressed *Cryab* (Figure S4C). We further  
238 analyzed the *in vivo* cellular properties of tRG by staining with cell fate markers from the late  
239 neurogenic stage onward. The majority of CRYAB<sup>+</sup> cells in the VZ and SVZ expressed low  
240 levels of TBR2, OLIG2, and KI67 at P5 and P10 (Figure 4E-G and 4E'-G'), suggesting that  
241 these cells were mostly post-mitotic (KI67<sup>-</sup>) and neither IPC (TBR2<sup>+</sup>) nor OPC (OLIG2<sup>+</sup>) at  
242 P10. These histochemical data were again consistent with our single-cell transcriptome data  
243 (Figure S4G). Concomitantly, the Gene Ontology (GO) term analysis of the ferret tRG cluster  
244 showed gene expression related to negative regulation of neurogenesis, neuron differentiation,  
245 and extracellular matrix organization (Figure S4H). Therefore, tRG-like cells in ferrets are  
246 equivalent to human tRG cells, and are further defined as tRG cells in ferrets. We noted a  
247 difference between humans and ferrets; conventional RG cells extending a radial fiber to the  
248 laminar surface also coexisted with these tRG cells in the VZ during postnatal development  
249 (Figure S4A), whereas the VZ became completely separated from the OSVZ in the  
250 corresponding stages of the human cortex as conventional RG cells were absent in the VZ  
251 (Nowakowski et al., 2016).

252

### 253 **tRG are formed from the apical division of RG sibling cells with a short basal fiber**

254 As predicted by pseudo-time trajectory analysis (Figure 5), tRG cells most likely originate from  
255 the late RG population. However, single-cell transcriptome analysis does not tell us how tRG  
256 are formed from the late RG, directly from RG by shortening their basal fiber, as a sibling from  
257 asymmetric divisions of RG cells, or more indirectly as progeny cells through further divisions  
258 of RG sibling cells. We addressed this question using time-lapse imaging of cortical slices of  
259 ferrets. To follow the sequential pattern of cell divisions and the shape of progeny cells in RG  
260 lineages, we introduced an EGFP-expressing vector using IUE at E35. 5-Ethynyl-2'-  
261 deoxyuridine (EdU) labeling as early as E38 detected cells in the ependymal layer, the final  
262 destination of majority of tRG cells (Figure S4I, and see the next section). Based on this  
263 observation, we started time-lapse imaging of slices in culture at E38 or P0, and continued  
264 imaging for three days, then fixed and stained slices for CRYAB and EGFP (STAR Methods).  
265 Using this procedure, we reconstructed the process of tRG formation from mitotic progenitor  
266 cells (four examples); in all these cases, vRG cells were not directly differentiated into tRG.  
267 Instead, CRYAB<sup>+</sup> cells were produced as daughter cells of an apical division of mitotic  
268 progenitor cells that bore both an apical endfoot and a short basal fiber (the deep blue cell in

269 Figure 4H). These non-vRG progenitor cells (the deep blue cell in Figure 4I) underwent  
270 interkinetic nuclear migration within the VZ and asymmetrically divided (13:20 in Figure 4H)  
271 into a CRYAB<sup>+</sup> daughter without the short fiber (the deep blue cell 13:20 onward in Figure  
272 4H) and a non-CRYAB-expressing daughter that inherited the short basal fiber (the light blue  
273 cell), as schematically drawn in Figure 4I. This CRYAB<sup>+</sup> cell extended a short basal process  
274 to acquire the tRG form (14:00–60:00 in Figure 4H, J). In two of these four examples, the  
275 mitotic mother cells of tRG (the deep blue cell in Figure 4K, L, see Supplementary movie 1)  
276 were generated as the sibling cells of a dividing vRG with a full-length radial fiber (the pink  
277 cell during 0:00–40:00 in Figure 4K, M). In the other two cases, we could not follow the birth  
278 of the tRG mother cell because of technical issues. Altogether, our data suggest that tRG cells  
279 are formed by apical asymmetric division(s) of unique apical IPCs with a short basal fiber  
280 (Tsunekawa et al. in preparation). We note the possibility that these IPC, which asymmetrically  
281 generated tRG, already expressed CRYAB. Indeed, a certain portion of CRYAB-expressing  
282 tRG (approximately 20%) was mitotically active, whereas it was post-mitotically declined  
283 (Figure 4E).

284

### 285 **Temporal fates of RG cells are predicted by pseudo-time trajectory analysis**

286 To understand the relationship between various cortical progenitors in the developing ferret  
287 brain, particularly the origin and fate of ferret tRG, pseudo-time trajectory analysis was  
288 performed using Monocle 2 (Trapnell and Cacchiarelli et al., 2014; Qiu and Mao et al., 2017).  
289 All single cells that had been subjected to single-cell transcriptome analyses (from E25 to P10)  
290 were unbiasedly ordered along a trajectory (Figure S5A, B) based on their transcriptome  
291 profiles. To simplify our analysis, we first excluded interneurons, microglia, endothelial cells,  
292 and excitatory neuronal clusters. Subsequently, 6,000 single cells were randomly selected from  
293 the remaining cell population for further analysis (see STAR Methods). We confirmed that this  
294 procedure successfully predicted the developmental trajectory of the somatosensory area, along  
295 which the selected cells were arranged in order from the earlier to later stages (Figure 5B). The  
296 pseudo-time analysis predicted a reasonable trajectory consisting of three branching points that  
297 generated seven branches (Figure 5A, S5B). We assigned major cell types for each branch on  
298 the basis of cell clusters defined by UMAP analysis (Figure 2, 5C, S5D; Table S3), naming  
299 each branch after its dominant cell type (Figure 5A); the first branching point generated the  
300 neuronally differentiated lineage (branch 2) and NPC 2 (branch 3); the second branching  
301 produced the OPC lineage (branch 4) and NPC 3 (branch 5); and the final branching point  
302 generated the ependymal (branch 6) and astroglial lineages (branch 7). This trajectory began

Bilgic et al\_2022.docx

303 with progenitor cells from early embryonic stages (E25; Figure 5B), and RG cells between E34  
304 and P1 gave rise to both neurogenic and gliogenic trajectories (Figure 5B, S5C, D). After birth,  
305 neurogenesis gradually declined, whereas gliogenic processes progressed (Figure 5B). The  
306 distribution of marker gene expression, and clusters along the pseudo-time trajectories  
307 suggested that the final branching segregated the NPC type3 cells (*Ptn*) into ependymal (*Foxj1*)  
308 and astroglial (*Aqp4*) fates (Figure 5C, S5C-D).

309  
310

### 311 **tRG cells possess ependymal and gliogenic potential during cortical development of** 312 **ferrets**

313 Interestingly, tRG cell population was distributed into three branches along the trajectory in  
314 the pseudo-time trajectory analysis (Figure 5D); NPC type3 (mainly during E40-P1),  
315 astroglial (from P1-P10), and ependymal (from P5-P10; Figure 5E) branches. Therefore,  
316 tRG prenatally arose as precursors of ependyma and astroglia in the ferret cortex. To test  
317 this hypothesis, we first examined cells differentiating into ependymal cells by  
318 immunostaining for a typical ependymal marker, FOXJ1, a master regulator of ciliogenesis,  
319 along with staining for CRYAB. We observed that CRYAB<sup>+</sup> tRG cells gradually co-  
320 expressed FOXJ1, reaching up to 90% of CRYAB<sup>+</sup> cells to be FOXJ1<sup>+</sup> by P10 (Figure 6A,  
321 B). Similarly, our transcriptome data showed that the fraction of *Cryab-Foxj1* double-  
322 positive cells increased in the tRG cluster from P1 to P10, whereas other RG clusters  
323 maintained low *Cryab* expression (Figure 6C, D). We further confirmed that differentiating  
324 ependymal cells resided within the VZ from P5 onwards (Figure 6A). These cells possessed  
325 short basal fibers with a cell body that finally settled on the apical surface by P14 (Figure  
326 6E). These data suggest that some tRG cells progressively upregulate *Foxj1* expression to  
327 adopt an ependymal cell fate during post-natal development. Concomitantly, detectable  
328 ADENINE CYCLASE III expression in both primary and multi-cilia cells indicated that  
329 ciliogenesis progressed postnatally, forming multi-ciliated ependymal cells on the  
330 ventricular surface of the ferret cortex by P35 (Figure 6F).

331

### 332 **Transcriptional analysis of human tRG subtypes by integration with ferret tRG subtypes**

333 We then performed transcriptome analysis to assess whether human tRG cells possess  
334 ependymal and gliogenic potential, as observed in ferrets. We tried to upgrade the resolution  
335 of our analysis considering two points: (1) choosing a recently published human dataset, which

336 include cells at GW25 and more tRG cells than do the previous datasets (Bhaduri et al., 2021),  
337 and (2) focusing our comparison on NPC populations, excluding neurons and other cell types  
338 from analysis. This approach identified respective clusters for tRG and oRG cells based on  
339 shared nearest neighbor clustering using their marker gene expression (Figure 7A and Table  
340 S4). We then merged human and ferret NPCs based on CCA-MNN (Figure 7B, C), a strategy  
341 described before (Figure 3A). The correlation between two arbitrary RG subtypes from humans  
342 and ferrets, which was calculated from marker-gene scores for the set of cluster marker genes,  
343 indicated that tRG and oRG in humans shared similar transcriptomes with tRG and later RG in  
344 ferrets, respectively (Figure S6A, B). We note that early RG in ferrets showed the highest  
345 similarity with “OLIG1” in human data, and no cell type in human data corresponded to ferret  
346 “midRG”, likely because only GW25 cells were chosen for comparison (see Figure S6B  
347 legend).

348

349 The integration of ferret and human datasets, as described above, showed that human and ferret  
350 tRG were mainly distributed into three different clusters: 7, 21, and 28 (Figure S6C, 7D, F).  
351 Cells in cluster 7 shared a transcriptomic expression pattern similar to that of the late RG cells,  
352 which was characterized by high expression of RG marker genes (such as *APOE*, *FABP7*,  
353 *NOTCH2*, and *DBI*; Figure S6D). Therefore, tRG cells in cluster 7 were in a late RG-like state  
354 that was presumably uncommitted to astroglial or ependymal fates (corresponding to cells in  
355 the NPC 3 branch in the pseudo-time trajectory; Figure 5A). In contrast, cells in clusters 21  
356 and 28 highly expressed marker genes as observed in the astrocyte (GFAP and AQP4) and the  
357 ependymal (FOXJ1 and CRYAB) clusters, respectively (Figure S6D and Table S4). To validate  
358 this classification of tRG cells into three main clusters after integration, we compared the  
359 clustering of ferret tRG cells in the merged dataset with the classification of ferret tRG cells in  
360 the pseudo-time trajectory analysis (Figure 7G). Indeed, these two independent approaches  
361 largely produced consistent results for classifying ferret tRG cells, suggesting that the  
362 bifurcation of tRG fates was reliable; for example, most tRG cells in the astroglia branch were  
363 assigned to cluster 21 (characterized by a strong expression of astrocyte markers) in the  
364 integrated dataset (Figure 7G). As human and ferret tRG cells shared a similar clustering result  
365 in the merged dataset, our results suggested that tRG cells in both humans and ferrets possessed  
366 the potential to generate astrocytes and ependymal cells. The proportion of the three types of  
367 tRG was different between human and ferret datasets, in which increased ependymal and  
368 gliogenic tRG cells were observed in ferrets and elevated late RG-like tRG cells were observed

369 in the human GW25 dataset (Figure 7D-F). This difference may be ascribed to the difference  
370 in developmental stages between the two datasets (see Discussion).

371

### 372 **Prediction of oRG-like cells using human anchors**

373 oRG could not be identified as a separate cluster in the ferret dataset. Attempts were made to  
374 assign oRG-like cells in the ferret dataset using human oRG cells as anchors, as was done for  
375 the tRG subtypes. During the integration of two datasets using Seurat, we already identified  
376 the MNN after CCA of both datasets, which made a nearest neighbor-pair between a ferret and  
377 a human cell, as described before (Figure 7B). These two cells had the most similar  
378 transcriptome profiles compared with other cells in each dataset, suggesting that the ferret cell  
379 which paired with a human oRG can be assigned as a ferret oRG-like cell. The assigned oRG-  
380 like ferret cells were located near the human oRG cluster (Figure 7H). To assess the degree of  
381 similarity to human oRG, we calculated the oRG score for each ferret oRG-like cell (Figure  
382 3E). The oRG-like cells assigned by MNN had significantly higher oRG cluster score than that  
383 of all other NPCs (Figure 7I). Because the cluster score successfully distinguished tRG cells  
384 from other cell types (Figure 3), we hypothesized that these oRG-like cells would show a  
385 transcriptome profile similar to that of authentic oRG in ferrets. A comparison between oRG-  
386 like cells and other NPCs in the ferret dataset identified genes that were highly expressed in  
387 oRG-like cells (Table S4). Consistent with the human dataset (Bhaduri et al., 2021), the  
388 expression of HOPX, CLU, and CRYM was higher in oRG-like cells than in other NPCs  
389 (Figure 7J, S6E). However, investigation in ferrets using *in situ* hybridization showed that  
390 typical human oRG markers, such as HOPX and CLU, were expressed in vRG and tRG as well  
391 as oRG (Figure S6F). Therefore, in ferrets, oRG can only be distinguished by a combination  
392 of several markers or the whole transcriptome, instead of a few marker genes.

393

### 394 **DISCUSSION**

395 In this study, a dataset of single-cell transcriptomes was generated using an improved gene  
396 model, which showed the developmental sequences and diversity of neural progenitor  
397 populations during ferret cortical development. This dataset allowed us to compare the  
398 progenitor subtypes and temporal patterns of their appearance between humans and ferrets at  
399 a high resolution, using the accumulated information of human embryonic cortical single-cell  
400 transcriptomes (Nowakowski et al., 2016, Bhaduri et al. 2020, Bhaduri et al., 2021). We found  
401 that ferrets (carnivora) and humans (primates), representing two different orders of  
402 gyrencephalic animals, shared a large proportion of progenitor variations and their temporal

403 sequences despite their extremely different temporal scales of neural development. This work  
404 emphasizes the importance of ferrets as a model animal to study the neural development of  
405 gyrencephalic animals. Information regarding the revised gene model is publicly available to  
406 help in accelerating comparative studies and gene modification approaches using ferrets.

407

#### 408 **Temporal pattern of ferret progenitors**

409 The temporal pattern and variation in ferret NPC were typically represented by a pseudo-time  
410 lineage trajectory and confirmed by immunohistochemical analysis of the developing brains  
411 (Figure 1). In the pseudo-time trajectory, Hes1<sup>+</sup> NPC passes through three consecutive  
412 branching points, each of which produces a side branch fated into terminal differentiation (first  
413 neurons, second oligodendrocytes, and third ependymal cells). This result is consistent with a  
414 consensus for the temporal transitions of embryonic neural stem cells from neurogenic to  
415 gliogenic, and with a recent finding of oligodendrocyte formation in the human dorsal cortical  
416 primordium (Huang et al. 2020). These self-renewing Hes1<sup>+</sup> and side branches gradually  
417 changed transcription profiles as the pseudo-time increased, and multiple progenitor types  
418 coexisted in parallel. The latest differentiating branching in the trajectory during the analyzed  
419 period generated tRG (Nowakowski et al. 2016) that was committed to ependymal fates.  
420 However, the tRG are not the last progeny of Hes1<sup>+</sup> NPC in ferrets. Instead, the tRG branch is  
421 parallel to another Hes1<sup>+</sup> NPC, which are mostly astrocyte progenitors that include a tRG  
422 subtype fated into astrocytes.

423

#### 424 **The origin and fates of tRG revealed by live imaging and single cell transcriptomes**

425 Live imaging of ferret brains indicated tRG generation via asymmetric divisions of RG-like  
426 progenitors with a short radial fiber. In ferrets, the production of this neurogenic type of  
427 progenitor from vRG was observed during earlier neurogenic stages (Tsunekawa et al. in  
428 preparation). These progenitors might change their fate to produce tRG during the late  
429 neurogenic and early gliogenic stages, contributing to gliogenesis and ependymal formation.  
430 As the sample size was small, further studies on this type of progenitor are needed.

431 While tRG were first identified in human brain development (Nowakowski et al. 2016),  
432 their detailed characteristics, such as the fate of their descendants, remain unclear. In ferrets,  
433 cells belonging to the tRG cluster are distributed into three interconnected branches: NPC3,  
434 ependymal (CRYAB<sup>+</sup>, FOXJ1<sup>+</sup>), and astrogenic (CRYAB<sup>+</sup>, GFAP<sup>+</sup>) branches in the pseudo-  
435 time trajectory. The tRG in the NPC3 branch were not committed to ependymal or astrogenic  
436 fates, suggesting that this tRG population was uncommitted. Histochemically, we confirmed

437 that a large part of the tRG became ependymal and astrogenic cells. This mode of ependymal  
438 cell formation is parallel to the bifurcation of ependymal cells and adult neural stem cells from  
439 the same progenitor population in the striatum on the ventral side (Ortiz-A'lvarez et al. 2019).

440 Our cross-species analysis using CCA-MNN combined with cluster score analysis  
441 predicted that human tRG were also classified into three classes with differential  
442 transcriptomes (Figure 7E), which corresponded to the three subtypes of ferret tRG. In GW25  
443 human brains, the uncommitted tRG fraction appeared to be major unlike in ferrets, raising the  
444 possibility that human tRG at GW25 progresses less along the differentiation axis compared to  
445 ferret tRG at P5-P10, most of which are already committed to either ependymal or astroglial  
446 states. Human GW25 is almost the latest stages available, and samples at the later stages might  
447 be very difficult to obtain. However, the result from ferrets predicts that tRG adopt the fate of  
448 ependymal cells and astroglial cells at later stages. Thus, the cross-species analysis with ferrets  
449 and humans provides a prediction as an advantage in this case, although checking whether the  
450 prediction is correct in humans is preferable.

451

452 A remarkable difference in the spatio-temporal pattern of NPC between ferrets and humans is  
453 the coexistence of vRG and tRG in the VZ at ferret late neurogenic and gliogenic stages  
454 whereas tRG is almost major NPC in the VZ in humans, thereby resulting in the spatial  
455 separation of the VZ from the OSVZ where oRG reside at late neurogenic stages. Therefore,  
456 genes that are preferentially expressed in late RG (compared with other RG) such as HOPX  
457 and CLU show nearly exclusive expression in the OSVZ in human. In contrast, the  
458 expression of those genes are observed less differentially between the VZ and OSVZ because  
459 of their expression in vRG as well as tRG.

460

461 In summary, we performed a comprehensive single-cell analysis of ferret cortical progenitors  
462 over the entire neurogenic and early gliogenic periods, and demonstrated that cross-species  
463 comparisons greatly contribute to define NPC states transcriptionally. In addition, we  
464 highlighted similarities and differences in NPC variations and temporal patterns between two  
465 gyrencephalic mammals, ferrets and humans. We created a useful dataset of ferret  
466 transcriptomes and provided comparison protocols for single-cell transcriptome analysis with  
467 high resolution for two different stages, tissues, or species.

468

469 **Acknowledgements**

Bilgic et al\_2022.docx

470 We thank Hiroshi Kiyonari for ferret breeding management; Kazuaki Yamaguchi, Rohab F.  
471 Abdelhamid, and Chiharu Tanegashima for sequencing of RNA and genomic DNA; Tomomi  
472 Shimogori for *in situ* hybridization; and all members of the Laboratory of Cell Asymmetry for  
473 technical supports and helpful discussion. This work was supported by JSPS KAKENHI Grant  
474 Numbers 18H04003, 17H05779, 19H04791, and RIKEN funds to F.M. M.B. was a RIKEN  
475 International Program Associate. Q.W. was supported by JSPS Postdoctoral Fellowship and  
476 RIKEN Special Postdoctoral Researcher Program.

477

#### 478 **Author contributions**

479 F.M. and Q.W. supervised the project. M.B., Q.W., and F.M. designed experiments and wrote  
480 the manuscript. M.K., O.N., Q.W., Y.K., and S.K. constructed new ferret gene models. M.B.  
481 and Q.W. carried out scRNA-seq experiments and performed bioinformatics analysis. M.B.,  
482 Y.T., A.S. and Q.W. performed molecular biological analysis. M.B. and T.S. performed  
483 histological analysis. T.S. carried out the time-lapse imaging. T.S. and Y.T. bred the ferrets.

484

#### 485 **Conflict of interest statement**

486 The authors declare no competing interests.

487

#### 488 **Data and code availability statement**

489 Genome assembly and Chromium linked-read sequences were deposited in the DDBJ under  
490 the accession number BLXN01000001-BLXN01022349 and DRA010274, and the gene  
491 models is available from Figshare under the DOI: 10.6084/m9.figshare.12807032. Single-cell  
492 RNA-seq data have been deposited in the DDBJ (PSUB013536).

493

494 Any information required to obtain and reanalyze the data reported in this paper is available  
495 from the lead contact upon request.

496

#### 497 **References**

498 Arlotta, P., Molyneaux, B.J., Chen, J., Inoue, J., Kominami, R., and MacKlis, J.D. (2005).  
499 Neuronal subtype-specific genes that control corticospinal motor neuron development in vivo.  
500 *Neuron* 45, 207–221.  
501 Bhaduri, A., Andrews, M.G., Mancina Leon, W., Jung, D., Shin, D., Allen, D., Jung, D.,  
502 Schmunk, G., Haeussler, M., Salma, J., et al. (2020). Cell stress in cortical organoids impairs  
503 molecular subtype specification. *Nat.* 2020 5787793 578, 142–148.



- 504 Bhaduri, A., Sandoval-Espinosa, C., Otero-Garcia, M., Oh, I., Yin, R., Eze, U.C., Nowakowski,  
505 T.J., and Kriegstein, A.R. (2021). An atlas of cortical arealization identifies dynamic molecular  
506 signatures. *Nat.* 2021 5987879 598, 200–204.
- 507 Britanova, O., Akopov, S., Lukyanov, S., Gruss, P., and Tarabykin, V. (2005). Novel  
508 transcription factor *Satb2* interacts with matrix attachment region DNA elements in a tissue-  
509 specific manner and demonstrates cell-type-dependent expression in the developing mouse  
510 CNS. *Eur. J. Neurosci.* 21, 658–668.
- 511 Capecchi, M.R., and Pozner, A. (2015). *ASPM* regulates symmetric stem cell division by  
512 tuning Cyclin E ubiquitination. *Nat. Commun.* 2015 61 6, 1–17.
- 513 DeAzevedo, L.C., Fallet, C., Moura-Neto, V., Daumas-Duport, C., Hedin-Pereira, C., and Lent,  
514 R. (2003). Cortical radial glial cells in human fetuses: Depth-correlated transformation into  
515 astrocytes. *J. Neurobiol.* 55, 288–298.
- 516 Fietz, S.A., Kelava, I., Vogt, J., Wilsch-Bräuninger, M., Stenzel, D., Fish, J.L., Corbeil, D.,  
517 Riehn, A., Distler, W., Nitsch, R., et al. (2010). OSVZ progenitors of human and ferret  
518 neocortex are epithelial-like and expand by integrin signaling. *Nat. Neurosci.* 13, 690–699.
- 519 Fujimori, A., Itoh, K., Goto, S., Hirakawa, H., Wang, B., Kokubo, T., Kito, S., Tsukamoto, S.,  
520 and Fushiki, S. (2014). Disruption of *Aspm* causes microcephaly with abnormal neuronal  
521 differentiation. *Undefined* 36, 661–669.
- 522 Hansen, D. V., Lui, J.H., Parker, P.R.L., and Kriegstein, A.R. (2010). Neurogenic radial glia  
523 in the outer subventricular zone of human neocortex. *Nat.* 2010 4647288 464, 554–561.
- 524 Huang, W., Bhaduri, A., Velmeshev, D., Wang, S., Wang, L., Rottkamp, C.A., Alvarez-Buylla,  
525 A., Rowitch, D.H., and Kriegstein, A.R. (2020). Origins and Proliferative States of Human  
526 Oligodendrocyte Precursor Cells. *Cell* 182, 594-608.e11.
- 527 Jayaraman, D., Kodani, A., Gonzalez, D.M., Mancias, J.D., Mochida, G.H., Vagnoni, C.,  
528 Johnson, J., Krogan, N., Harper, J.W., Reiter, J.F., et al. (2016). Microcephaly Proteins *Wdr62*  
529 and *Aspm* Define a Mother Centriole Complex Regulating Centriole Biogenesis, Apical  
530 Complex, and Cell Fate. *Neuron* 92, 813–828.
- 531 Johnson, M.B., Wang, P.P., Atabay, K.D., Murphy, E.A., Doan, R.N., Hecht, J.L., and Walsh,  
532 C.A. (2015). Single-cell analysis reveals transcriptional heterogeneity of neural progenitors in  
533 human cortex. *Nat. Neurosci.* 18, 637–646.
- 534 Johnson, M.B., Sun, X., Kodani, A., Borges-Monroy, R., Girskis, K.M., Ryu, S.C., Wang, P.P.,  
535 Patel, K., Gonzalez, Di.M., Woo, Y.M., et al. (2018). *Aspm* knockout ferret reveals an  
536 evolutionary mechanism governing cerebral cortical size. *Nat.* 2018 5567701 556, 370–375.
- 537 De Juan Romero, C., Bruder, C., Tomasello, U., Sanz-Anquela, J.M., and Borrell, V. (2015).

538 Discrete domains of gene expression in germinal layers distinguish the development of  
539 gyrencephaly. *EMBO J.* 34, 1859–1874.

540 Karasawa, S., Araki, T., Yamamoto-Hino, M., and Miyawaki, A. (2003). A Green-emitting  
541 Fluorescent Protein from Galaxeidae Coral and Its Monomeric Version for Use in Fluorescent  
542 Labeling. *J. Biol. Chem.* 278, 34167–34171.

543 Kawasaki, H., Iwai, L., and Tanno, K. (2012). Rapid and efficient genetic manipulation of  
544 gyrencephalic carnivores using in utero electroporation. *Mol. Brain* 5, 1–7.

545 Kawaue, T., Shitamukai, A., Nagasaka, A., Tsunekawa, Y., Shinoda, T., Saito, K., Terada, R.,  
546 Bilgic, M., Miyata, T., Matsuzaki, F., et al. (2019). *Lzts1* controls both neuronal delamination  
547 and outer radial glial-like cell generation during mammalian cerebral development. *Nat.*  
548 *Commun.* 2019 101 10, 1–18.

549 Kessar, N., Fogarty, M., Iannarelli, P., Grist, M., Wegner, M., and Richardson, W.D. (2005).  
550 Competing waves of oligodendrocytes in the forebrain and postnatal elimination of an  
551 embryonic lineage. *Nat. Neurosci.* 2005 92 9, 173–179.

552 Kou, Z., Wu, Q., Kou, X., Yin, C., Wang, H., Zuo, Z., Zhuo, Y., Chen, A., Gao, S., and Wang,  
553 X. (2015). CRISPR/Cas9-mediated genome engineering of the ferret. *Cell Res.* 2015 2512 25,  
554 1372–1375.

555 Liu, J., Liu, W., Yang, L., Wu, Q., Zhang, H., Fang, A., Li, L., Xu, X., Sun, L., Zhang, J., et al.  
556 (2017). The Primate-Specific Gene *TMEM14B* Marks Outer Radial Glia Cells and Promotes  
557 Cortical Expansion and Folding. *Cell Stem Cell* 21, 635-649.e8.

558 McConnell, S.K. (1988). Fates of visual cortical neurons in the ferret after isochronic and  
559 heterochronic transplantation. *J. Neurosci.* 8, 945–974.

560 Noctor, S.C., Scholnicoff, N.J., and Juliano, S.L. (1997). Histogenesis of Ferret Somatosensory  
561 Cortex. *J. Comp. Neurol* 387, 179–193.

562 Nowakowski, T.J., Pollen, A.A., Sandoval-Espinosa, C., and Kriegstein, A.R. (2016).  
563 Transformation of the Radial Glia Scaffold Demarcates Two Stages of Human Cerebral Cortex  
564 Development. *Neuron* 91, 1219–1227.

565 Nowakowski, T.J., Bhaduri, A., Pollen, A.A., Alvarado, B., Mostajo-Radji, M.A., Di Lullo, E.,  
566 Haessler, M., Sandoval-Espinosa, C., Liu, S.J., Velmeshev, D., et al. (2017). Spatiotemporal  
567 gene expression trajectories reveal developmental hierarchies of the human cortex. *Science*  
568 (80-. ). 358, 1318–1323.

569 Ohtsuka, T., Imayoshi, I., Shimojo, H., Nishi, E., Kageyama, R., and McConnell, S.K. (2006).  
570 Visualization of embryonic neural stem cells using *Hes* promoters in transgenic mice. *Mol.*  
571 *Cell. Neurosci.* 31, 109–122.

572 Ortiz-Álvarez, G., Daclin, M., Shihavuddin, A., Lansade, P., Fortoul, A., Faucourt, M.,  
573 Clavreul, S., Lalioti, M.E., Taraviras, S., Hippenmeyer, S., et al. (2019). Adult Neural Stem  
574 Cells and Multiciliated Ependymal Cells Share a Common Lineage Regulated by the Geminin  
575 Family Members. *Neuron* *102*, 159-172.e7.

576 Polioudakis, D., de la Torre-Ubieta, L., Langerman, J., Elkins, A.G., Shi, X., Stein, J.L., Vuong,  
577 C.K., Nichterwitz, S., Gevorgian, M., Opland, C.K., et al. (2019). A Single-Cell  
578 Transcriptomic Atlas of Human Neocortical Development during Mid-gestation. *Neuron* *103*,  
579 785-801.e8.

580 Pollen, A.A., Nowakowski, T.J., Chen, J., Retallack, H., Sandoval-Espinosa, C., Nicholas, C.R.,  
581 Shuga, J., Liu, S.J., Oldham, M.C., Diaz, A., et al. (2015). Molecular Identity of Human Outer  
582 Radial Glia during Cortical Development. *Cell* *163*, 55–67.

583 Poluch, S., and Juliano, S.L. (2015). Fine-Tuning of Neurogenesis is Essential for the  
584 Evolutionary Expansion of the Cerebral Cortex. *Cereb. Cortex* *25*, 346–364.

585 Pulvers, J.N., Bryk, J., Fish, J.L., Wilsch-Bräuninger, M., Arai, Y., Schreier, D., Naumann, R.,  
586 Helppi, J., Habermann, B., Vogt, J., et al. (2010). Mutations in mouse *Aspm* (abnormal spindle-  
587 like microcephaly associated) cause not only microcephaly but also major defects in the  
588 germline. *Proc. Natl. Acad. Sci. U. S. A.* *107*, 16595–16600.

589 Qiu, X., Mao, Q., Tang, Y., Wang, L., Chawla, R., Pliner, H.A., and Trapnell, C. (2017).  
590 Reversed graph embedding resolves complex single-cell trajectories. *Nat. Methods* *14*, 979–  
591 982.

592 Rash, B.G., Duque, A., Morozov, Y.M., Arellano, J.I., Micali, N., and Rakic, P. (2019).  
593 Gliogenesis in the outer subventricular zone promotes enlargement and gyrification of the  
594 primate cerebrum. *Proc. Natl. Acad. Sci.* *116*, 7089 LP – 7094.

595 Reillo, I., and Borrell, V. (2012). Germinal Zones in the Developing Cerebral Cortex of Ferret:  
596 Ontogeny, Cell Cycle Kinetics, and Diversity of Progenitors. *Cereb. Cortex* *22*, 2039–2054.

597 Reillo, I., De Juan Romero, C., García-Cabezas, M.Á., and Borrell, V. (2011). A role for  
598 intermediate radial glia in the tangential expansion of the mammalian cerebral cortex. *Cereb.*  
599 *Cortex* *21*, 1674–1694.

600 Rossi, A.M., Fernandes, V.M., and Desplan, C. (2017). Timing temporal transitions during  
601 brain development. *Curr. Opin. Neurobiol.* *42*, 84–92.

602 Rowitch, D.H., and Kriegstein, A.R. (2010). Developmental genetics of vertebrate glial–cell  
603 specification. *Nat.* *2010* 4687321 *468*, 214–222.

604 Shitamukai, A., Konno, D., and Matsuzaki, F. (2011). Oblique radial glial divisions in the  
605 developing mouse neocortex induce self-renewing progenitors outside the germinal zone that

606 resemble primate outer subventricular zone progenitors. *J. Neurosci.* *31*, 3683–3695.

607 Sidman, R.L., and Rakic, P. (1973). Neuronal migration, with special reference to developing  
608 human brain: a review. *Brain Res.* *62*, 1–35.

609 Smart, I.H.M., Dehay, C., Giroud, P., Berland, M., and Kennedy, H. (2002). Unique  
610 Morphological Features of the Proliferative Zones and Postmitotic Compartments of the Neural  
611 Epithelium Giving Rise to Striate and Extrastriate Cortex in the Monkey. *Cereb. Cortex* *12*,  
612 37–53.

613 Stuart, T., Butler, A., Hoffman, P., Hafemeister, C., Papalexi, E., Mauck, W.M., Hao, Y.,  
614 Stoeckius, M., Smibert, P., and Satija, R. (2019). Comprehensive Integration of Single-Cell  
615 Data. *Cell* *177*, 1888-1902.e21.

616 Szemes, M., Gyorgy, A., Paweletz, C., Dobi, A., and Agoston, D. V. (2006). Isolation and  
617 characterization of SATB2, a novel AT-rich DNA binding protein expressed in development-  
618 and cell-specific manner in the rat brain. *Neurochem. Res.* *31*, 237–246.

619 Trapnell, C., Cacchiarelli, D., Grimsby, J., Pokharel, P., Li, S., Morse, M., Lennon, N.J., Livak,  
620 K.J., Mikkelsen, T.S., and Rinn, J.L. (2014). The dynamics and regulators of cell fate decisions  
621 are revealed by pseudotemporal ordering of single cells. *Nat. Biotechnol.* 2014 324 *32*, 381–  
622 386.

623 Tsunekawa, Y., Terhune, R.K., Fujita, I., Shitamukai, A., Suetsugu, T., and Matsuzaki, F.  
624 (2016). Developing a de novo targeted knock-in method based on in utero electroporation into  
625 the mammalian brain. *Development* *143*, 3216–3222.

626 Wang, X., Tsai, J.W., Lamonica, B., and Kriegstein, A.R. (2011). A new subtype of progenitor  
627 cell in the mouse embryonic neocortex. *Nat. Neurosci.* *14*, 555–562.

628 Yamamoto, S., Yamashita, A., Arakaki, N., Nemoto, H., and Yamazaki, T. (2014). Prevention  
629 of aberrant protein aggregation by anchoring the molecular chaperone  $\alpha$ B-crystallin to the  
630 endoplasmic reticulum. *Biochem. Biophys. Res. Commun.* *455*, 241–245.

631 Zheng, K., Wang, C., Yang, J., Huang, H., Zhao, X., Zhang, Z., and Qiu, M. (2018). Molecular  
632 and Genetic Evidence for the PDGFR $\alpha$ -Independent Population of Oligodendrocyte Progenitor  
633 Cells in the Developing Mouse Brain. *J. Neurosci.* *38*, 9505–9513.

634 Zhong, S., Zhang, S., Fan, X., Wu, Q., Yan, L., Dong, J., Zhang, H., Li, L., Sun, L., Pan, N.,  
635 et al. (2018). A single-cell RNA-seq survey of the developmental landscape of the human  
636 prefrontal cortex. *Nature* *555*, 524–528.

637

638 **FIGURE TITLES AND LEGENDS**

639 **Figure 1. Temporal patterns of neurogenesis and gliogenesis in the cerebral cortex of**  
640 **ferrets**

641 (A) Schematic of cortical development and emergence of neural progenitor diversity in humans  
642 and ferrets. Progenitors sequentially undergo DL-neurogenesis, UL-neurogenesis, and  
643 gliogenesis and form ependymal cells. In both humans and ferrets, RG and oRG have been  
644 morphologically and positionally identified while tRG have been reported in humans only. VZ,  
645 ventricular zone; ISVZ, inner subventricular zone; OSVZ, outer subventricular zone; IZ,  
646 intermediate zone; DL, deep layer; UL, upper layer; CP, cortical plate; Mn, migrating neuron;  
647 IP, intermediate progenitor; and EPC, ependymal cell. (B-G) Coronal sections of the  
648 somatosensory cortices immunostained for PAX6 (red), TBR2 (green), and OLIG2 (cyan) from  
649 early to late neurogenesis at E25, E32, E36, E40, P5, and P10. Scale bars: 100  $\mu$ m. The position  
650 of image strips at each stage is shown in the dorsal hemisphere images presented below  
651

652 **Figure 2. Single-cell RNA-seq reveals ferret transcriptome signatures and the cell types**

653 (A) Schematic illustration of the experimental design and time points to build the transcriptome  
654 atlas of developing somatosensory cortex of ferrets. Single cells were isolated using 10X  
655 Chromium (see STAR Methods). (B) UMAP visualization of cells colored by Seurat clusters  
656 and annotated by cell types (as shown in D, E). (C) UMAP plot of cells colored by samples.  
657 Labels were named by cell isolation stages with suffixes “AG” or “T” to indicate IUE samples  
658 with azamigreen or those with no IUE, respectively (See STAR Methods). RG, IP, OPC, and  
659 excitatory neuron populations are highlighted on the plot. (D) Heatmap showing expression  
660 profiles of cluster marker genes based on log fold-change values. Cells were grouped by Seurat  
661 clustering (transverse). Cell types were assigned according to the expression of marker and  
662 differentially expressed genes in each cluster; RG, radial glia; tRG, truncated RG; IPC,  
663 intermediate progenitor cell; DL, deep layer neurons; UL, upper layer neurons; OPC,  
664 oligodendrocyte precursor cell; ITN, interneuron; and EN, endothelial cells. Color bar matches  
665 Seurat clusters in (B). The representative genes among 10 topmost enriched genes are shown  
666 per cluster, with typical marker gene note on the right side. (E) Normalized expression levels  
667 of representative marker genes of different cell types projected onto the UMAP plot in (B). EP,  
668 ependymal and MG, microglia. (F) The expression pattern of *CRYAB*, a marker for tRG, which  
669 had been described only in humans and primates. (G) The expression pattern of *HOPX*, a  
670 marker for oRG in humans and primates in the UMAP plot. (H) Immunostaining for *CRYAB*<sup>+</sup>

Bilgic et al\_2022.docx

671 tRG (green) and HOPX<sup>+</sup> RG (red) together with DAPI on P1 and P10 germinal layers. HOPX<sup>+</sup>  
672 cells are observed in all germinal layers during late neurogenic stages

673

674 **Figure 3. Comparison of molecular identity of RG subtypes between ferret and human**

675 (A) UMAP visualization of integrated human (n=2672; left) and ferret (n=30, 234; right)  
676 single-cell dataset colored by different clusters. The names of clusters from human and ferret  
677 cells begin with "H" and "F" capitalization, respectively. (B) Proportional representation of  
678 cells from different stages and species. Schematics of the corresponding stages between ferrets  
679 and human are shown. (C, D) Correlation coefficient (C) and significance (D) between  
680 indicated clusters of ferrets and humans, calculated by marker gene scores. (E) Normalized  
681 expression levels of the indicated genes in humans and ferrets from each progenitor cluster. (F)  
682 tRG scores of the indicated cell in each cell cluster, presented as box-whiskers for humans and  
683 ferrets. The lines in the box-whiskers from top to bottom indicate maximum (except outliers),  
684 third to first quartile, median, and minimum (except outliers). The points outside the box  
685 indicate outliers. Outliers are 1.5-fold larger or smaller than interquartile range from the third  
686 or first quartile, respectively

687 **Figure 4. Truncated tRG is emerged during postnatal cortical development in ferrets**

688 (A) Representative image showing the cellular features of tRG in ferret P0 apical germinal  
689 zones stained for GFP and CRYAB. (B) Ferret embryonic RG was sparsely labelled with a  
690 GFP-expressing plasmid at E30 via IUE. MAX projection was performed on a 30  $\mu$ m  
691 vibratome section with 5  $\mu$ m interval for each z-image. Scale bar, 50  $\mu$ m. (B) The expression  
692 patterns of CRYAB (green) and PAX6 (red) in ferret germinal zones during postnatal  
693 development (P1, P5, and P10). Cryosection thickness: 12  $\mu$ m. (C) Quantification of CRYAB<sup>+</sup>  
694 cells among all nuclei (DAPI) in the VZ by immunohistochemistry (width, 150  $\mu$ m; n=3 for  
695 P5; n=2 for P10; Wilcoxon rank-sum test *p*-value 6.574e-08). (D) Histogram showing the  
696 number of cells by age in the tRG cluster annotated in the ferret transcriptome dataset (Figure  
697 2B). (E-G) Quantification of KI67-, TBR2-, or OLIG2-expressing cells among the CRYAB<sup>+</sup>  
698 cell population in the VZ (n=2 for P5; n=2 for P10 for each staining except n=3 for TBR2  
699 staining), as displayed in the box and whisker plots. Box-whiskers indicate lines of the  
700 maximum and minimum, with a box of upper and lower quartiles with the median. (E'-G')  
701 Representative images with MAX projection used for quantification. Images were taken using  
702 a 100 $\times$  objective lens with immersion oil on cortical slices of 12  $\mu$ m (z-step, 1.5  $\mu$ m). (H-M)  
703 Time-lapse imaging of EGFP-labeled progenitor cells forming tRG. Please refer to the text for

Bilgic et al\_2022.docx

704 further details. EGFP fluorescence was visualized. The time below each snapshot strip  
705 indicates the time passed after the slice culture was started. (H-J) An apically attached IPC with  
706 a short basal fiber produced a tRG cell. (H) Sequential snapshots showing that an IPC formed  
707 tRG through apical division (both cells are marked in deep blue and by white arrows). The  
708 sibling cells of tRG are marked by bright blue color and open arrows. (I) Schematic  
709 representation of tRG formation recorded in (H). IPC and tRG are marked in deep blue; the  
710 sibling of tRG is indicated by light blue. (J) Immunostaining of a cryostat section from a fixed  
711 slice stained for Cryab (red) and EGFP (green). (K-L) A vRG cell is divided to produce an  
712 apical IPC that produces tRG. Please see the time-lapse movie 1 and main text for further  
713 details. (K) Sequential snapshots. The white arrowheads indicate ancestral vRG (pinked-  
714 colored); the white arrows (deep blue-colored cell body) indicate IPC generated from the vRG  
715 and then the CRYAB<sup>+</sup> daughter of the IPC; open arrows indicate the other daughter of the  
716 divided IPC (light blue). (L) Schematic of time-lapse imaging, as shown in (K). (M) The  
717 cultured slice was fixed and stained for EGFP (green), CRYAB (red), and FOXJ1 (light blue).  
718 Scale bar, 50  $\mu$ m

719

## 720 **Figure 5. Temporal fates of RG cells predicted by pseudo-time trajectory analysis**

721 (A) The pseudo-time trajectory branching tree of the developing cortex in ferrets (Monocle v2).  
722 Cellular distribution at each branch on UMAP plot shown in Figure 2B. Cell types representing  
723 each branch and their gene markers are shown next to the branches (see below). (B) Branching  
724 trees split by collection stages (AG samples are shown). (C) Distribution of cells expressing  
725 marker genes for major cell states or fates along trajectories. Color densities indicate the log-  
726 normalized unique molecular identifier (UMI) count for each gene. Branches strongly  
727 expressing *Hes1* were named NPC 1, 2, and 3 branches. (D) The distribution of tRG cells along  
728 branching trees and tRG-focused UMAP visualization. The tRG cells (162) were found on  
729 three branches, NPC3 (9.3%; 15 cells), ependymal-tRG (61.1%; 99 cells), and astroglial-tRG  
730 (29.6%; 48 cells). (E) The composition of three types of tRG in (D) by the collection stage (AG  
731 and T samples are combined). No tRG cells were collected from E25 and E34

732

## 733 **Figure 6. Ferret tRG undergo postnatal ependymal differentiation**

734 (A) Immunostaining of 12- $\mu$ m cortical cryosections for CRYAB (green) and FOXJ1 (red),  
735 focusing on the VZ at E40, P3, P5, P10, P14, and P35. Scale bar, 50  $\mu$ m. (B) Numbers of  
736 FOXJ1-expressing cells in CRYAB-expressing cells in the VZ (n=3 for P5; n=2 for P10;  
737 Wilcoxon rank sum test *p*-value 1.749e-05). (C) Number of cells having UMI counts higher

Bilgic et al\_2022.docx

738 than 0.25 for both *Cryab* and *Foxj1* in the mid and late RG, or tRG clusters is shown in Figure  
739 2B. Color bars indicate the stages of sample collection. *Cryab*- and *Foxj1*-expressing cells  
740 increased over time in the tRG cluster only. (D) Normalized expression of *Foxj1* in the  
741 indicated ferret clusters. (E) Cortical origin and shape of FOXJ1-expressing ependymal cells.  
742 Staining for FOXJ1 at P14 after labeling cortical progenitors by an mCherry-expressing vector  
743 via IUE at E30. The maximum projection images with 1  $\mu\text{m}$  z-step size are shown; cryosection  
744 thickness, 12  $\mu\text{m}$ ; scale bar, 20  $\mu\text{m}$ . (F) The onset of ciliogenesis in the developing cortex of  
745 ferrets, as shown by staining for adenine cyclase III (cyan) along the VZ surface at E40, P5,  
746 P10, and P35. Scale bars, 10  $\mu\text{m}$

747

#### 748 **Figure 7. Comparison of tRG and oRG subtypes between ferrets and humans**

749 (A) UMAP visualization of human brain cells colored by cell type and identified by marker  
750 genes (data from Bhaduri et al., 2021). (B) Schematic of the integration strategy of human and  
751 ferret subtypes. (C) UMAP visualization of integrated ferret and human datasets colored by  
752 different clusters. (D, E) Identification of three tRG subtypes in ferrets (D) and humans (E).  
753 The red dots highlight the indicated tRG subtypes. (F) Distribution of humans (left) and ferrets  
754 (right) tRGs in the integrated dataset. Human and ferret tRG were identified from the separated  
755 dataset. (G) Distribution of ferret tRG subtypes (identified by the pseudo-time analysis) in the  
756 integrated dataset. (H) Identification of oRG-like cells in ferret (left) and oRG in human (right).  
757 The red dots highlight the indicated oRG-like cells or oRGs. (I) oRG scores for oRG-like cells  
758 and other NPCs in ferrets. (J) The expression pattern of *CRYM*, *CLU*, and *HOPX* in oRG-like  
759 cells and other NPCs in ferrets. (F) *in situ* hybridization for *Clu* indicates that this gene is  
760 expressed in all of the VZ, ISVZ, and OSVZ.

761



762

## 763 **Supplementary Figure Legends**

764

### 765 **Figure S1. Development of the cerebral cortex in ferrets**

766 (A) Immunostaining for CTIP2 (green) and SATB2 (red) at the same developmental stages as  
767 in Figure 1B, showing the onset of DL- (E25 or earlier) and UL-neurogenesis (E32-E34). VZ,  
768 ventricular zone; ISVZ, inner subventricular zone; OSVZ: outer subventricular zone; IZ,  
769 intermediate zone; DL, deep layer; UL, upper layer; and CP, cortical plate. Scale bars: 100  $\mu$ m

770 (B) Gliogenic progenitors as revealed by immunostaining for GFAP in cortical germinal layers  
771 at E32, E36, E40, P5, and P10. Scale bars: 100  $\mu$ m

772 (C) Validation of cortically generated OLIG2<sup>+</sup> oligodendrocyte precursors at P10 cerebral  
773 cortex after mCherry labeling at E30. Arrowheads in the cropped images of the upper panels  
774 (Figures S1C-i and S1C-ii) indicate cells that co-express mCherry, PAX6, and OLIG2 in the  
775 OSVZ and VZ. Scale bars: 20  $\mu$ m

776

### 777 **Figure S2. Cell types in the developing cerebral cortex of ferrets**

778 (A) Violin plots showing the number of genes (nFeature) and mRNAs (nCount) per cell in each  
779 sample and time point. Progenitor clusters (mid RG, late RG, tRG, and IPC) contained more  
780 cells from “AG” samples than from unsorted “T” samples, indicating a successful enrichment  
781 of progenitor cell types in “AG” samples (Figure S2C). (B) Table comparing quality-control  
782 metrics of an alignment with either MusPutFur 1.0 (UCSC gene models) or MusPutFur 2.60  
783 (this study) using E34 samples. The total number of genes detected and median genes per cell  
784 were higher with MusPutFur 2.60 (C) Heatmap of expression level of cell cycle marker genes  
785 based on log fold-change values. *PCNA*, *DUT*, *SIVAI*, and *TYMS* are shown as markers of the  
786 S-phase; *UBE2C*, *CDCA4*, *CENPF*, and *CCNBI* are shown as markers of the G2M-phase.  
787 Three subclusters among early RG, late RG, and IPC clusters expressed different markers for  
788 cell-cycle states. Color bar at top indicates seurat clusters matching those in Figure 2B. (D)  
789 Dotplot showing average expression and percentage of expression of representative marker  
790 genes for individual cell types in the merged dataset. The largest cluster was composed of  
791 upper-layer neurons, and their four clusters were combined as a single “UL” group. P.E.,  
792 percentage of expression and A.E., average expression. (E) Percentage of each cell type in the  
793 merged dataset (left) and each sample (right). The color bar at the right matches samples of  
794 cell collection in (A).

795

796 **Figure S3 Comparison of molecular identity of RG subtypes between ferret and human**

797 (A) UMAP visualization of integrated ferret (n=30, 234) and human (n=2672) single-cell  
798 datasets colored by different clusters. The names of clusters from human and ferret cells begin  
799 with "H" and "F", respectively. (B) Expression patterns of the indicated genes in each cluster.  
800 The color of the cycle indicates the expression level of each gene. The size of cycles indicates  
801 the percentage of cells expressing the gene in the indicated cluster

802

803 **Figure S4. Emergence of ferret tRG during postnatal cortical development**

804 (A) Cellular features of a tRG cell in cortex labelled with GFP at embryonic stages by IUE.  
805 Vibratome sections at P0 and P4 (thickness=200  $\mu$ m) were immunostained for CRYAB (green)  
806 and GFP (red). CRYAB<sup>+</sup> truncated basal fibers spanned up to the SVZ. (B) CRYAB expression  
807 among RG subtypes with different morphology in P10 cortex. Percentage of CRYAB<sup>+</sup> cells in  
808 oRG (12 cells), vRG (15 cells), and tRG (12 cells), (n=3), distinguished by sparse labeling with  
809 GFP by electroporation at P1. Representative images below show that oRG cells do not express  
810 CRYAB. (C) Pies showing the percentage of *Cryab* expression in the ferret clusters of the  
811 transcriptome dataset (Figure 2). Cells were counted positive if log-normalized UMI counts for  
812 *Cryab* were higher than 0.25 using Seurat "WhichCells" function (slot="data"). (D) Violin plot  
813 indicating the normalized expression of *Cryab* in ferret clusters shown in Figure 2. (E)  
814 Numbers of *Cryab*-expressing cells in the transcriptome dataset (Figure 2). *Cryab* expression  
815 was undetectable at E25. *Cryab*-expressing cells in the midRG and lateRG subtypes did not  
816 change in all stages (cell numbers; 58, 46, 68, 55, and 61 at E34, E40, P1, P5, and P10,  
817 respectively), while the number of *Cryab*<sup>+</sup> tRG cells increased after birth (cell numbers; 0, 21,  
818 50, 91, and 118 at E34, E40, P1, P5, and P10, respectively). (F) The onset of CRYAB  
819 expression on the germinal layers of developing cortex in ferrets. Immunostaining for CRYAB  
820 (left) and DAPI (right) on cryosections at E32, E40, P3, P5, and P10 (thickness=12  $\mu$ m). (G)  
821 Violin plots indicating the normalized expression levels of *Tbr2* (or *Eomes*) and *Olig2* in ferret  
822 clusters shown in Figure 2. (H) Gene enrichment analysis using tRG markers on EnrichR (572  
823 genes found by FindMarkers Seurat function; X-axis, -log<sub>10</sub> (adjusted *p-value*). Biological  
824 processes are shown (-LOG<sub>10</sub> (adjusted *p-value*)>2.25) (I) To determine the appropriate  
825 timing of time-lapse observation (Figure 4H, I), a late timing of divisions of progenitors  
826 producing tRG was examined by labelling cells with EdU at E30 (producing deep layer  
827 neurons), E34 (Layer IV), E38 (upper layer neurons), and P6 (late neurogenic stages), and  
828 chasing labelled cells at P35.

829

830

831 **Figure S5. Temporal fates of RG cells identified by pseudo-time trajectory analysis**

832 (A) Ferret cells used for pseudo-time trajectory analysis were lined up along the stretched  
833 pseudo-time axis. These cells were color-coded according to collection (orig.ident) and UMAP  
834 clusters (Subtype.combined), separately. Along the pseudo-time axis, expression levels of  
835 marker-genes are also shown for typical cell types; LIX1 and HMGA2 for early RG, EOMES  
836 and NEUROG2 for IP, RGS20, and PTN for late RG, PDGFR and OLIG2 for glial cells, and  
837 FOXP1 and FAM216B for ependymal cells. (B) Branching trees labelled by pseudo-time score.  
838 Color scale indicates  $\log_{10}(\text{pseudo-time} + 0.1)$  values. Each branch is named after the major  
839 cell type or state. (C) The composition of each branch by clusters is shown in the UMAP plot  
840 (Figure 2). Percentage was calculated for a cluster among all cells from a branch. (D) Branching  
841 trees split by UMAP clusters (Figure 2).

842

843 **Figure S6. Comparison of the tRG and oRG subtypes between ferrets and humans**

844 (A, B) A matrix of correlations between two arbitrary RG subtypes from humans and ferrets  
845 by calculating marker gene scores as described for Figure 3. (A) Correlations and (B)  $p$ -values  
846 between pairs in human and ferret clusters are shown (see STAR Methods). The early RG in  
847 ferrets showed the highest similarity with “OLIG1” in human data (see Figure S7B and its  
848 legend). This might be because of two reasons; (1) we included human cells from GW25 only  
849 and no human early RG in this dataset, and (2) cells in “OLIG1” highly expressed genes related  
850 with cell proliferation, which was observed in the early RG also (added to the supplementary  
851 table S4). We did not observe any cell types in human data corresponding to the ferret “midRG”  
852 with the same reason described above. (C) Distribution of human and ferret tRGs in the  
853 integrated dataset. The number in the X-axis indicates the cluster number identified by the  
854 UMAP in Figure 7C. (D) Expression pattern of the subtype maker genes in the three tRG-  
855 enriched clusters (7, 21, and 28). (E) The expression patterns of *CRYM*, *CLU*, and *HOPX* in  
856 oRG-like cells and other NPCs in humans. (F) *in situ* hybridization of *Clu* at the ferret cortex  
857 showed its expression in all of the VZ, ISVZ, and OSVZ at P5.

858

**Figure.1. Development of the ferret cerebral cortex.**

**A**

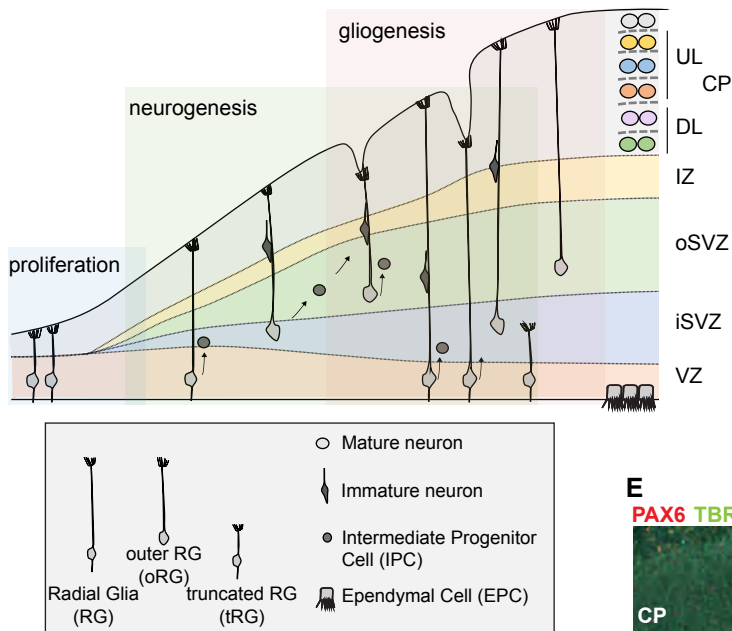

**F**

PAX6 TBR2 OLIG2

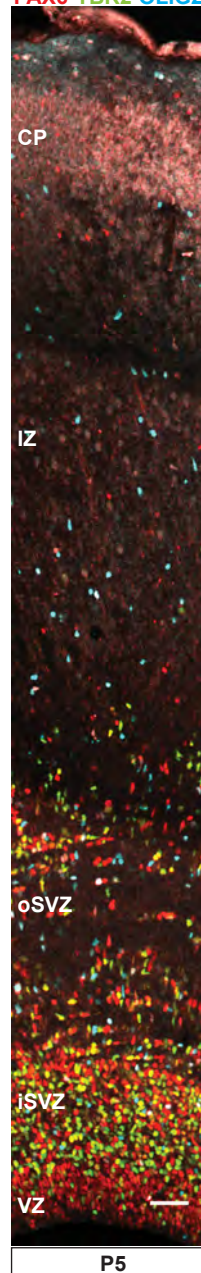

**G** PAX6 TBR2 OLIG2

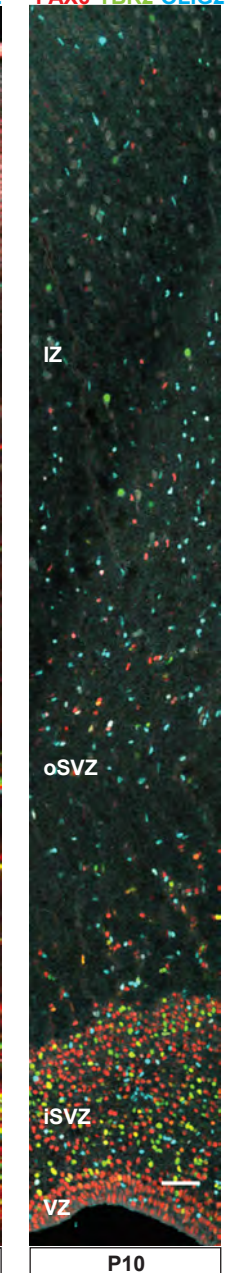

**E**

PAX6 TBR2 OLIG2

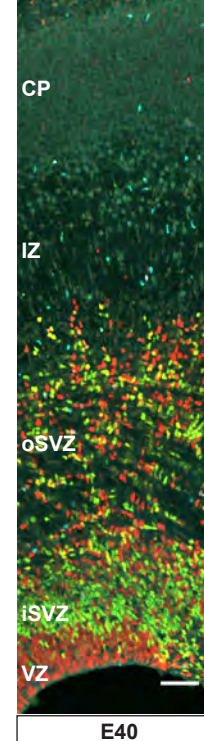

**D**

PAX6 TBR2 OLIG2

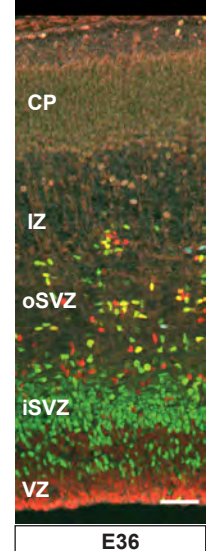

**C**

PAX6 TBR2 OLIG2

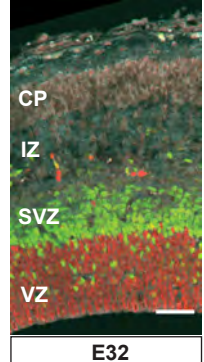

**B**

PAX6 TBR2 OLIG2

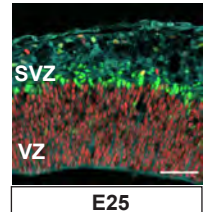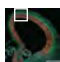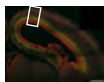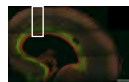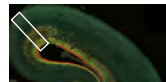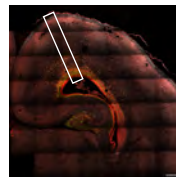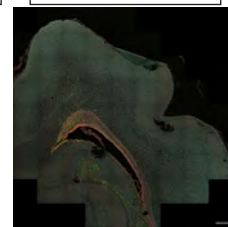

**Figure S1. Development of the ferret cerebral cortex.**

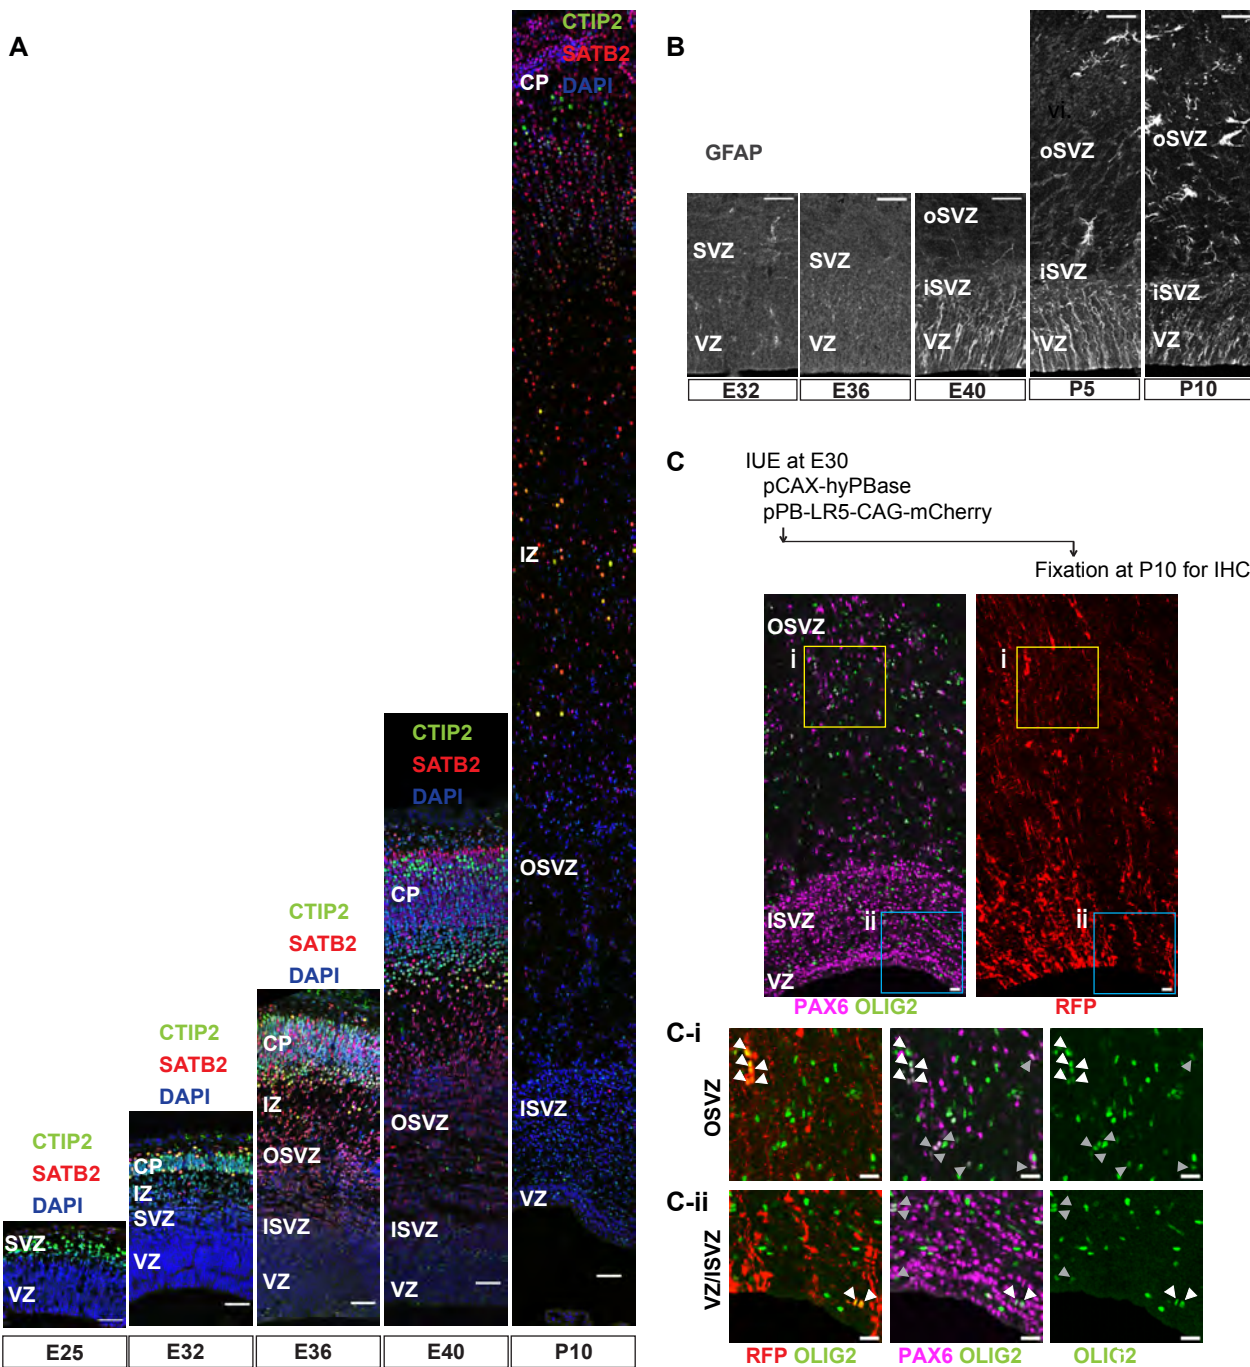

**Figure.2. Cell types in developing ferret cerebral cortex.**

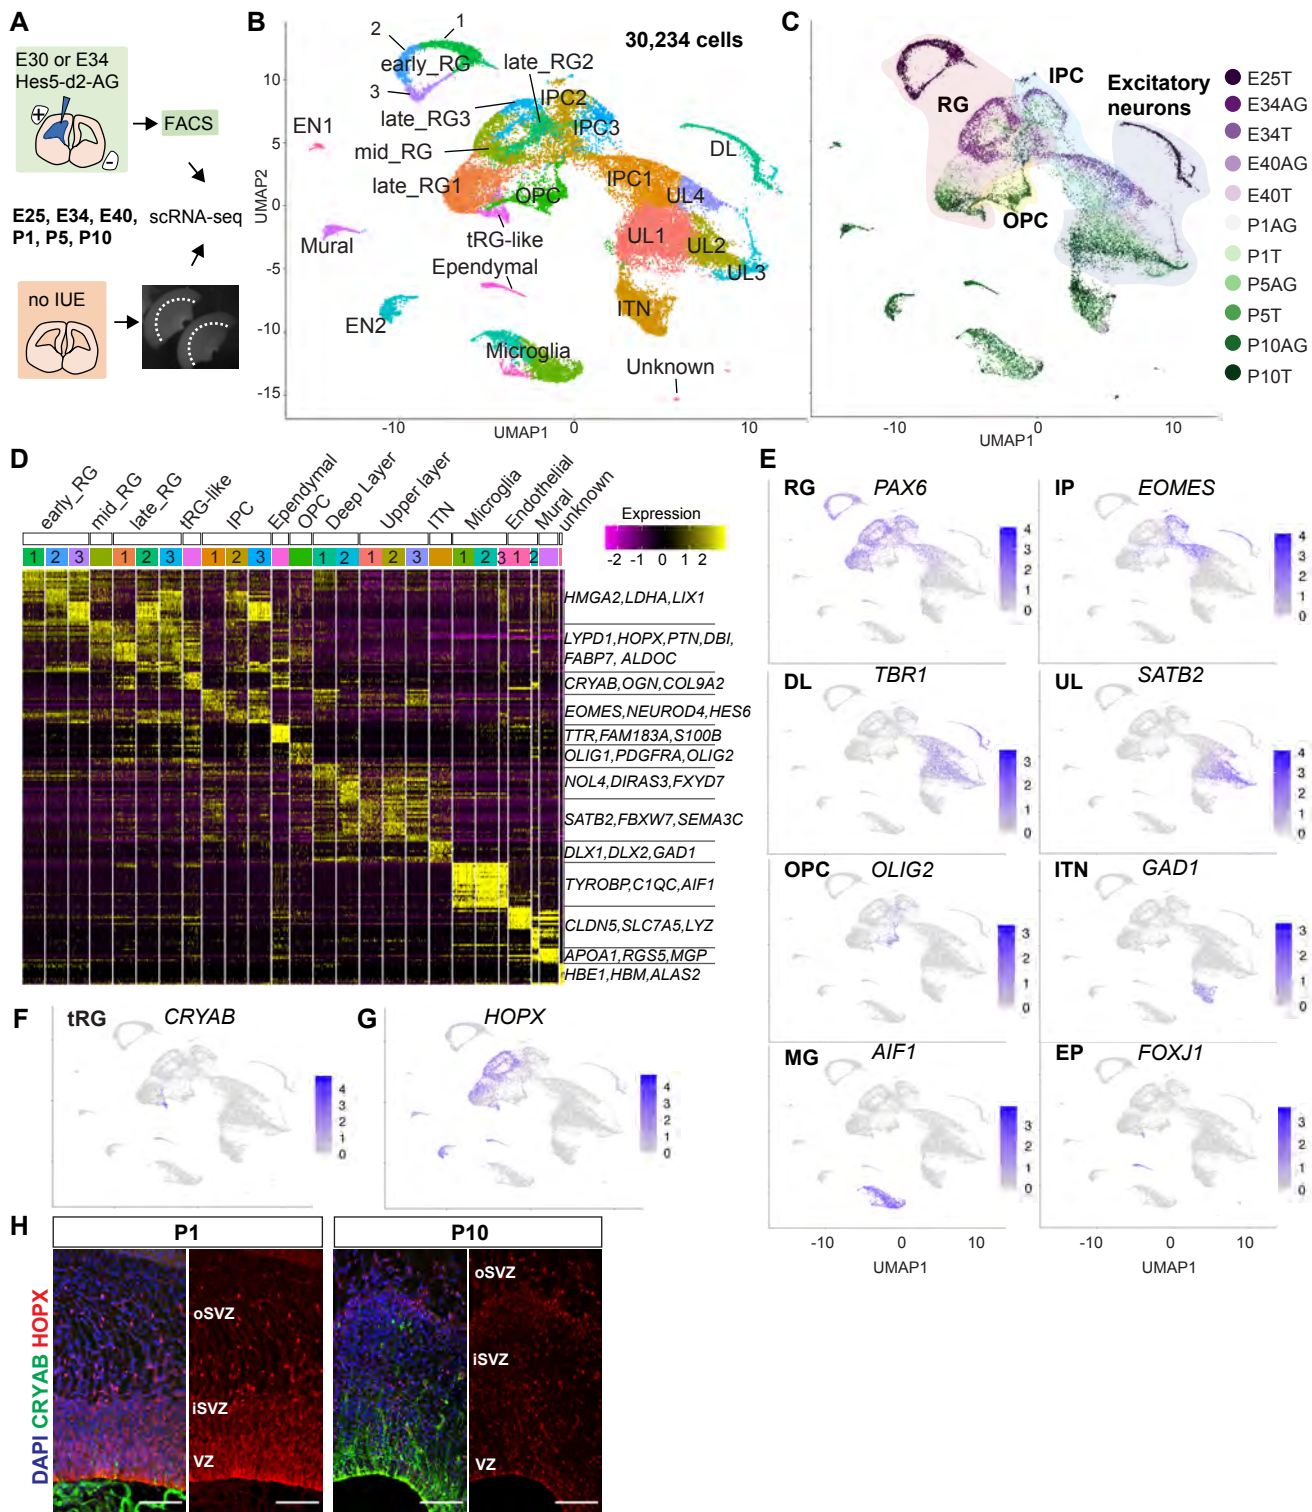

**Figure S2. Cell types in developing ferret cerebral cortex.**

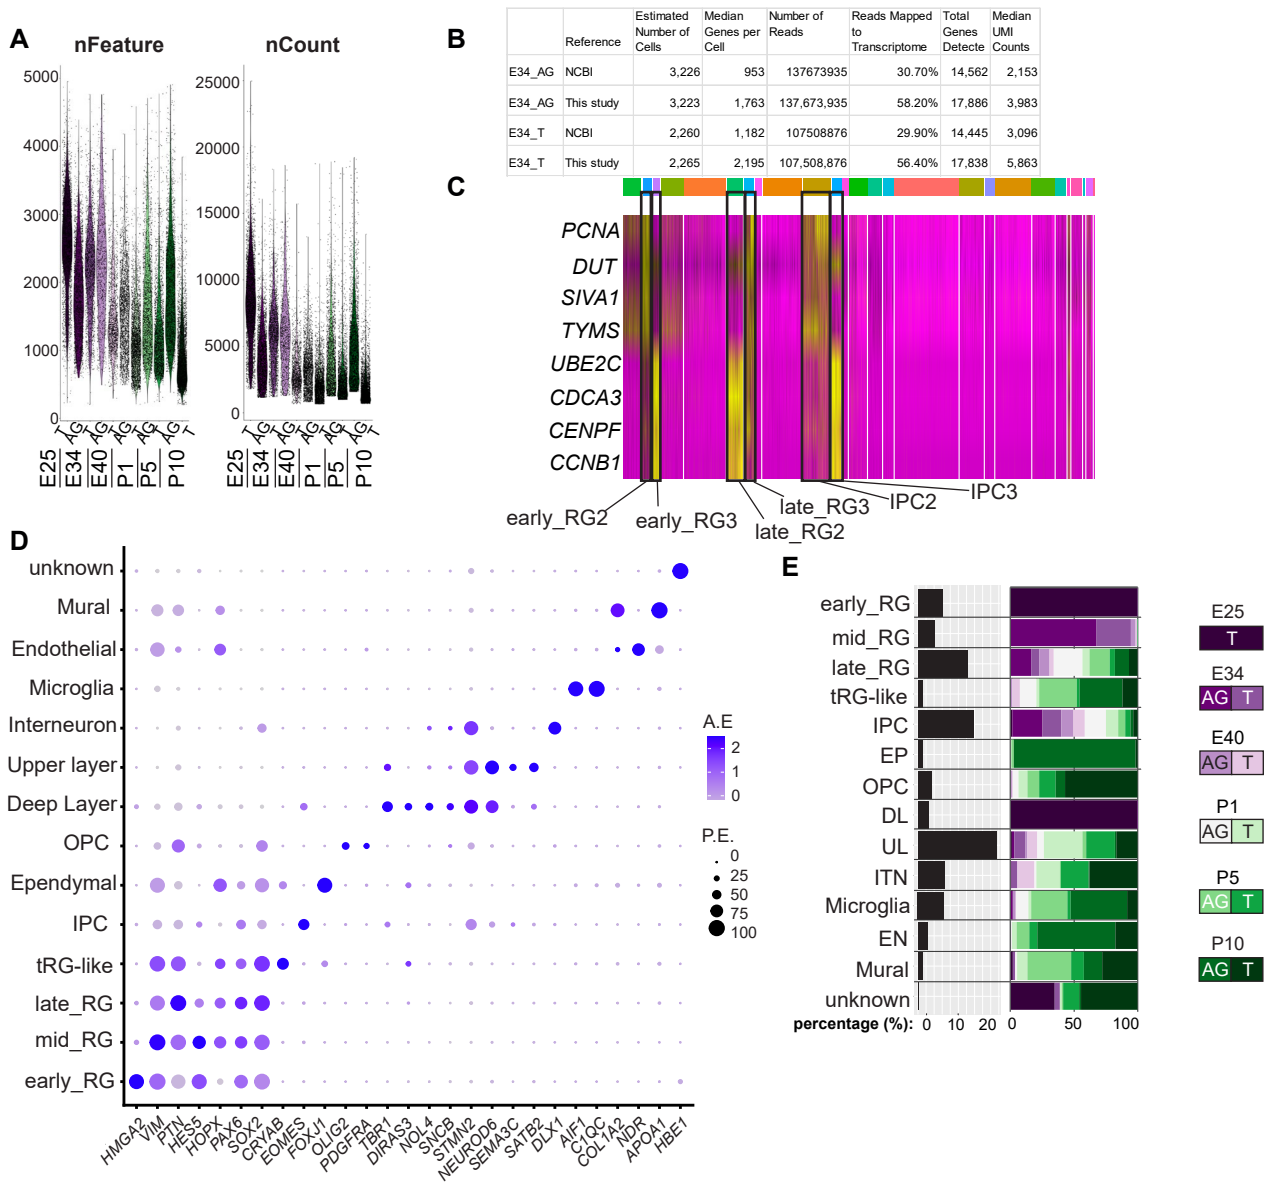

**Figure 3. Comparison of molecular identity of RG subtypes between ferret and human.**

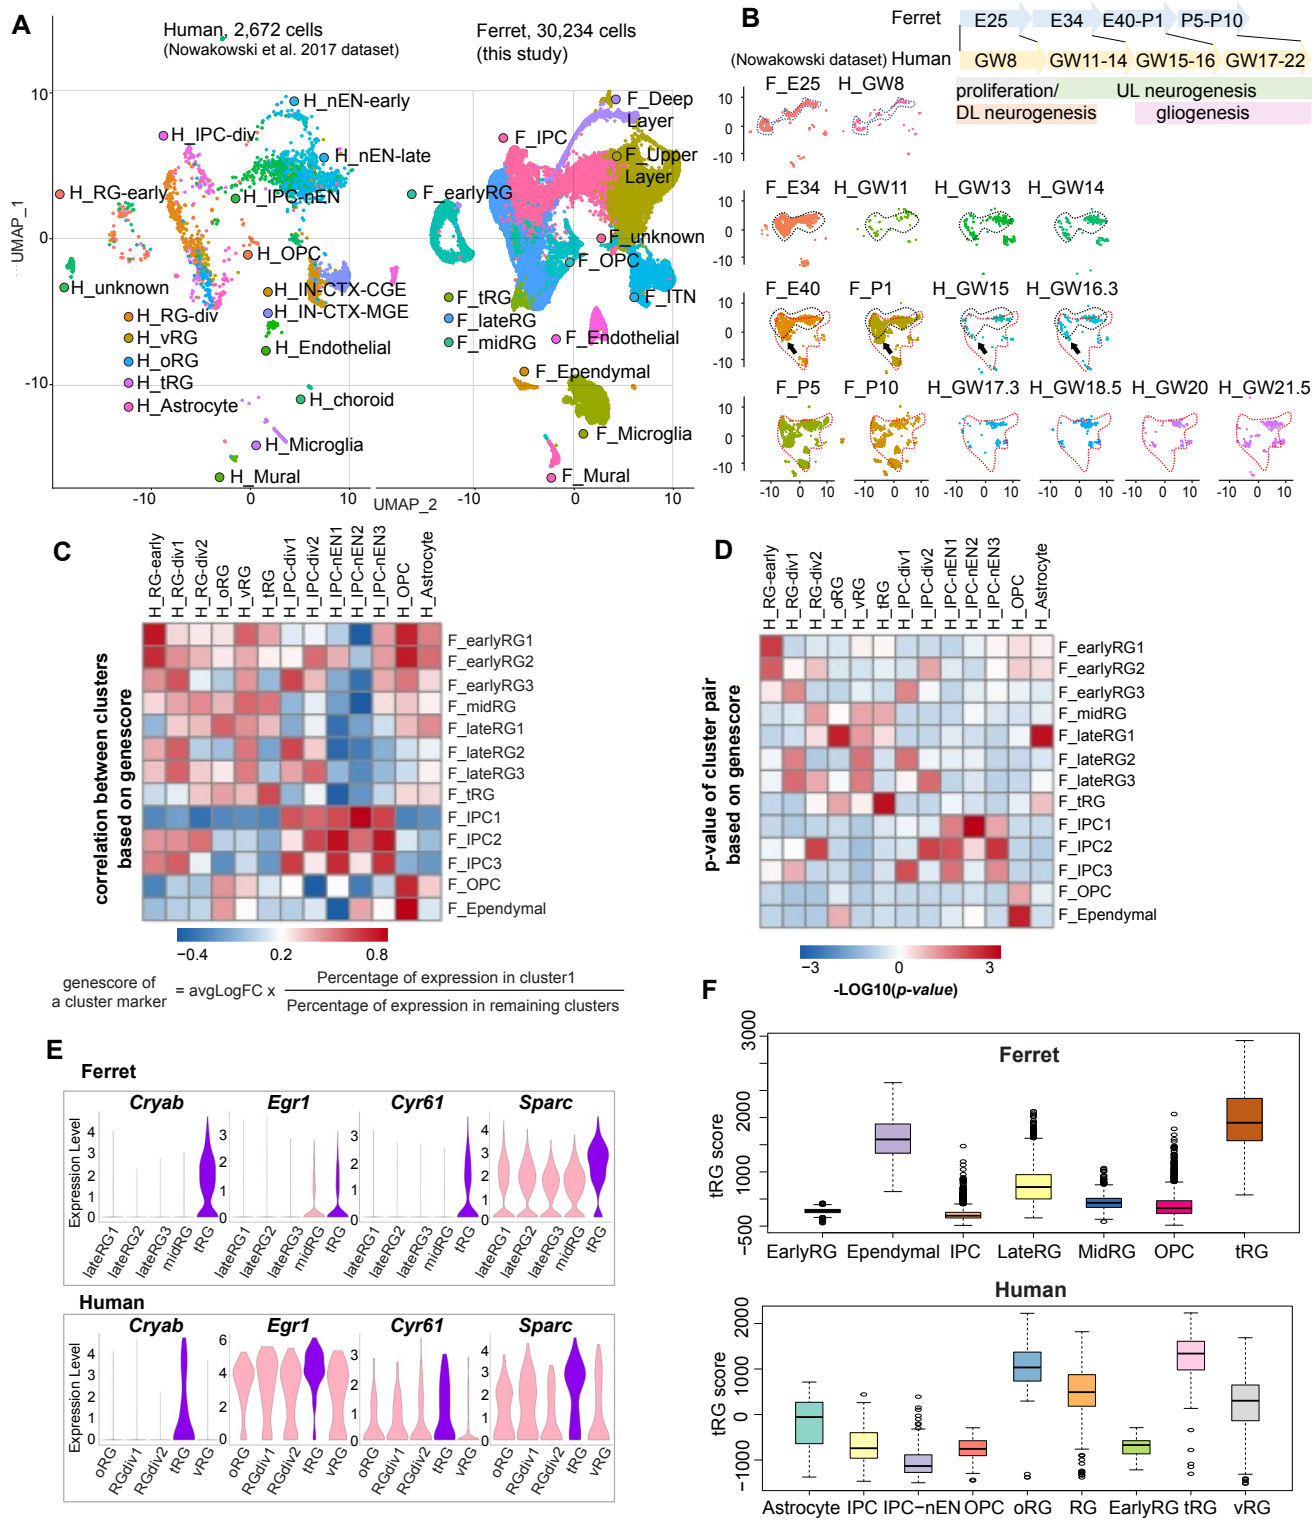





**Figure 4. Emergence of ferret tRG during post-natal cortical development.**

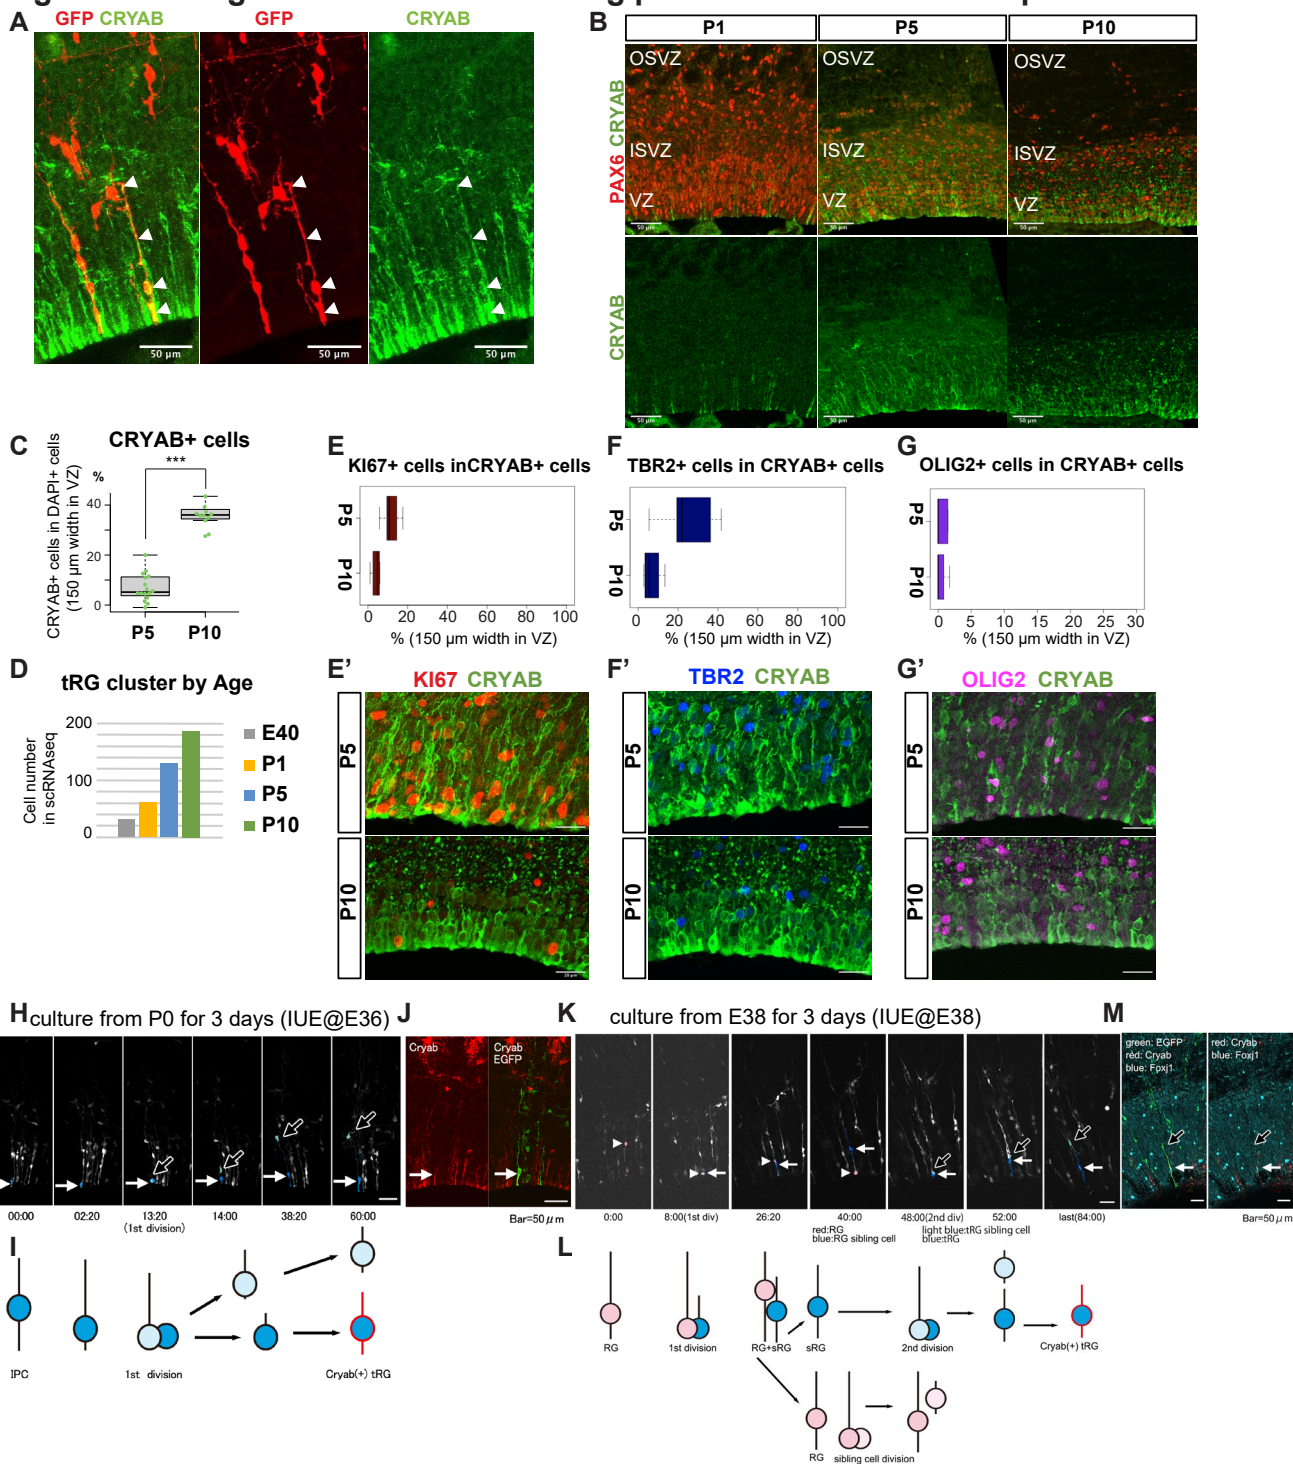

**Figure S4. Emergence of ferret tRG during post-natal cortical development.**

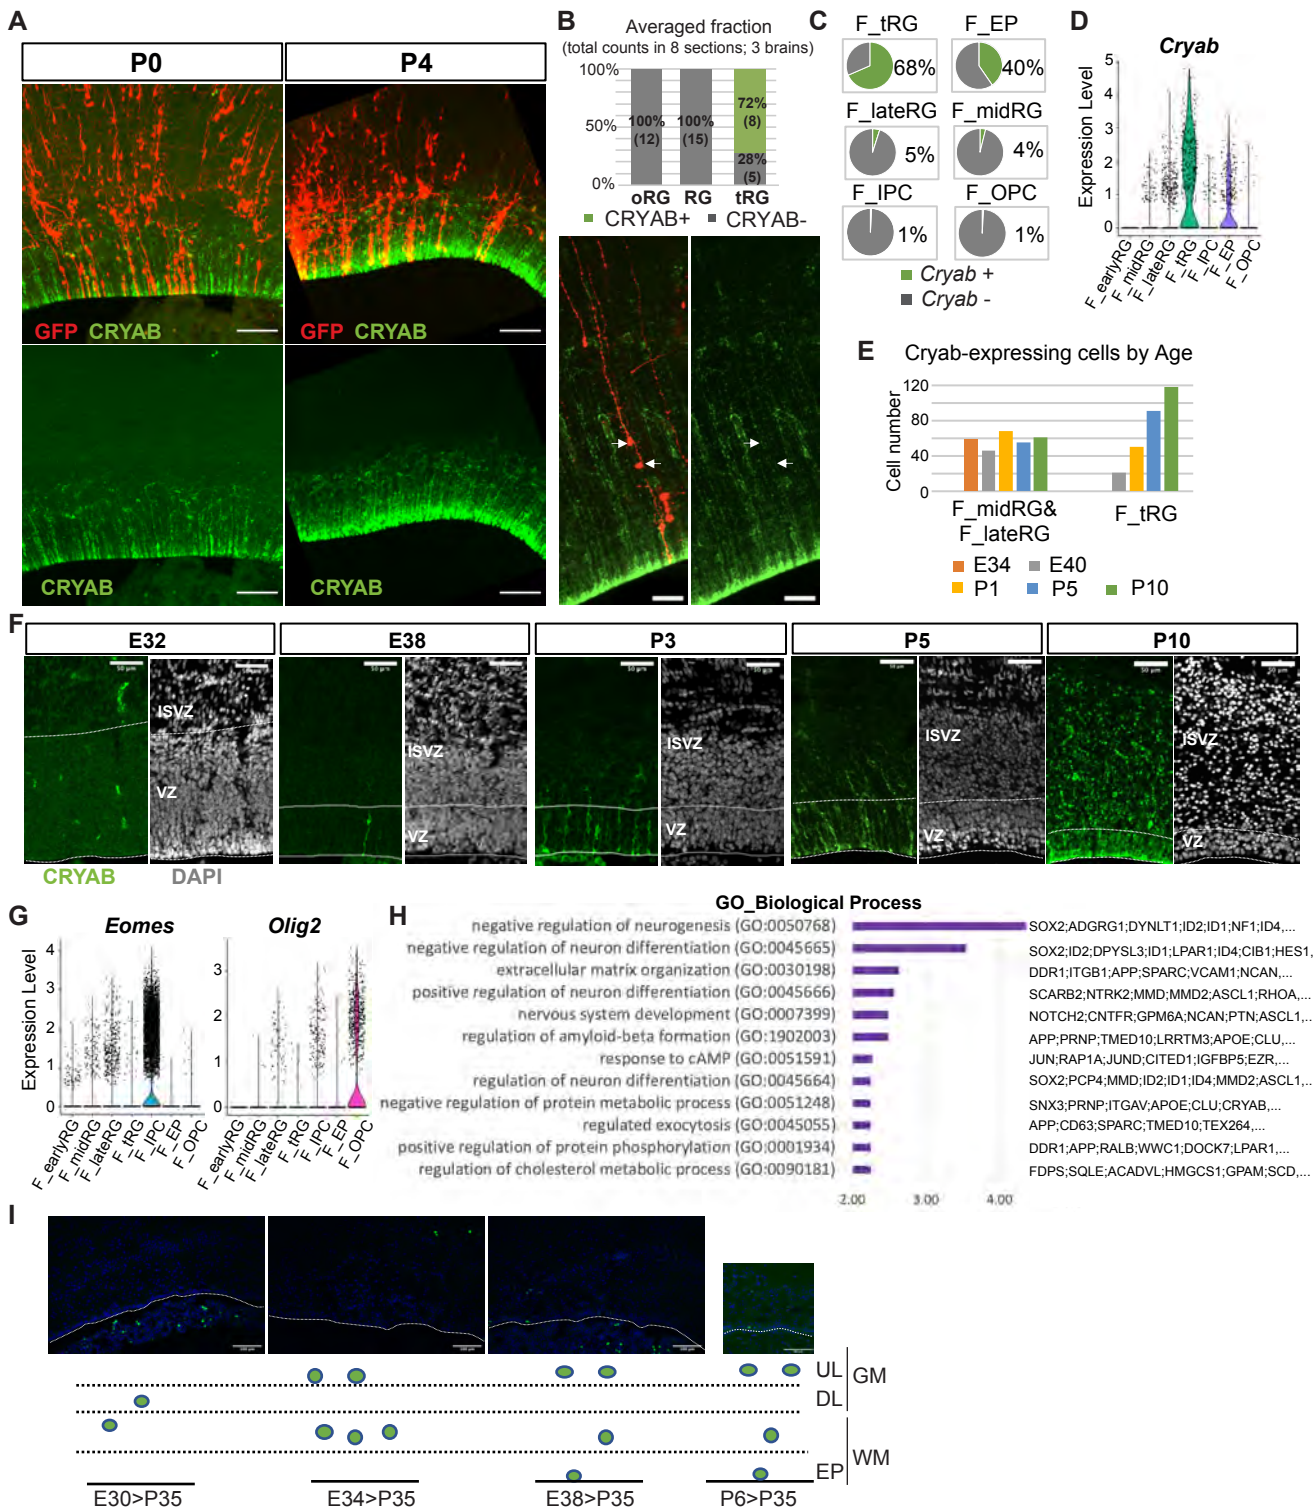

**Figure 5. tRG contribute to ependymal and glial production.**

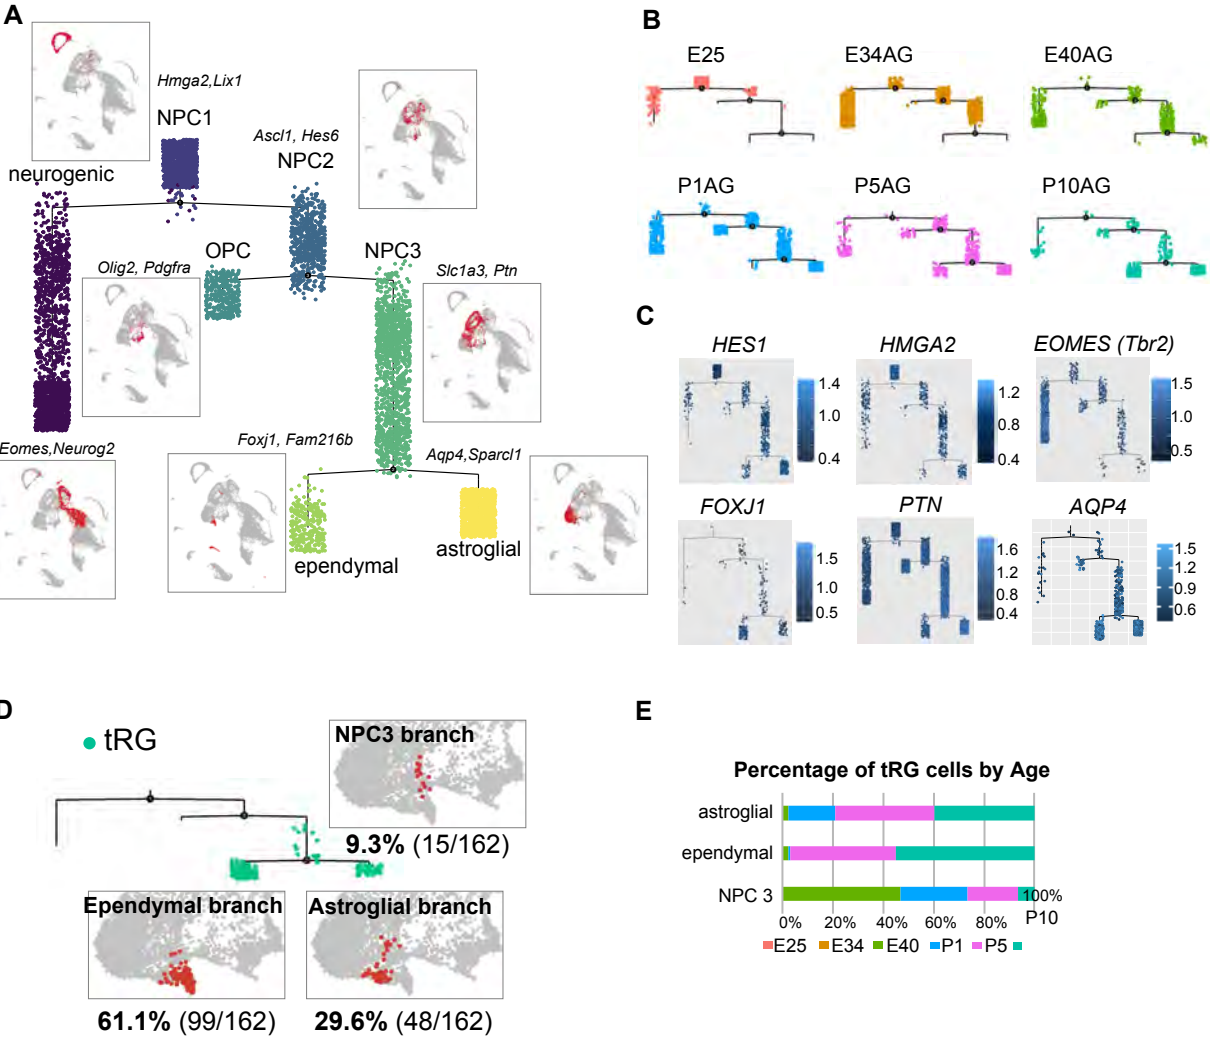

**Figure S5. tRG contribute to ependymal and glial production.**

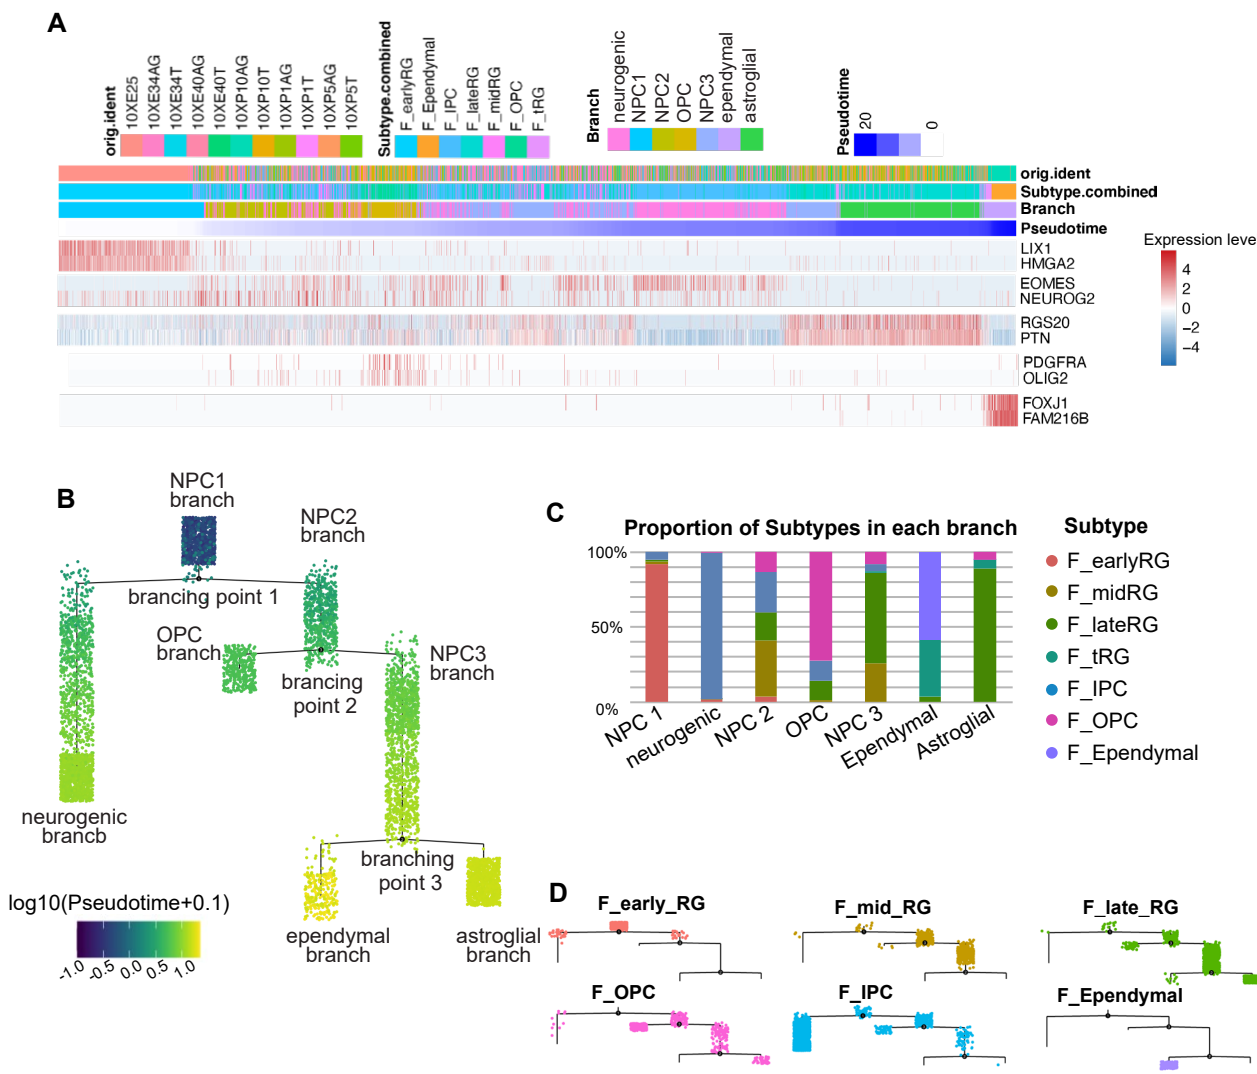

Figure.6. Ferret tRG undergo endodermal differentiation postnatally in ferrets.

A

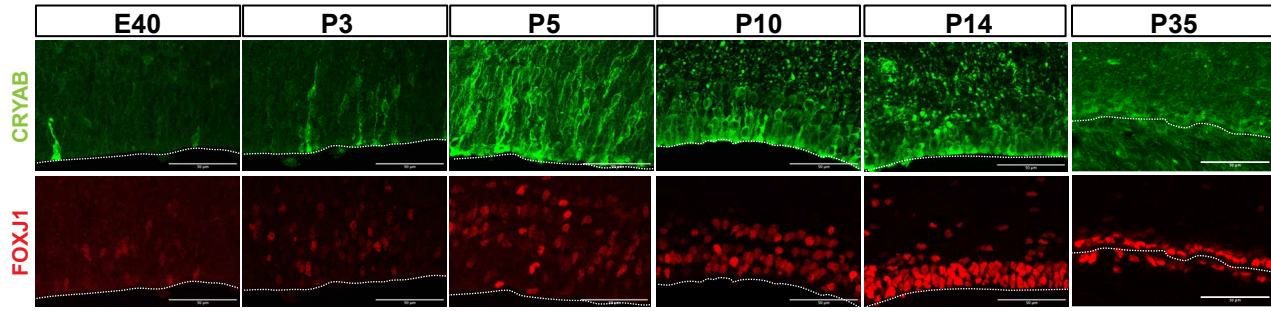

B

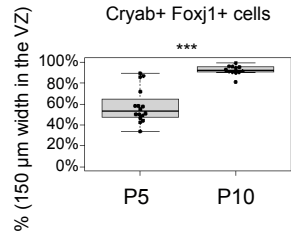

C

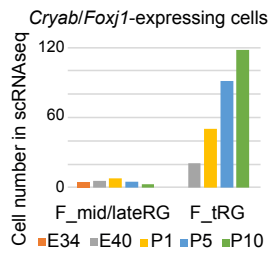

D

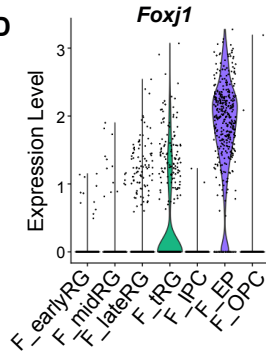

E

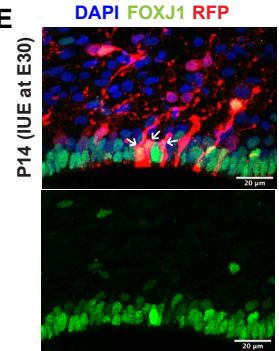

F

DAPI AdeninCyclaseIII

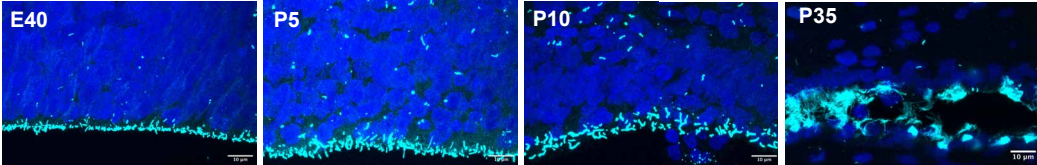

**Figure 7 . Comparison of differential tRG states between ferret and human.**

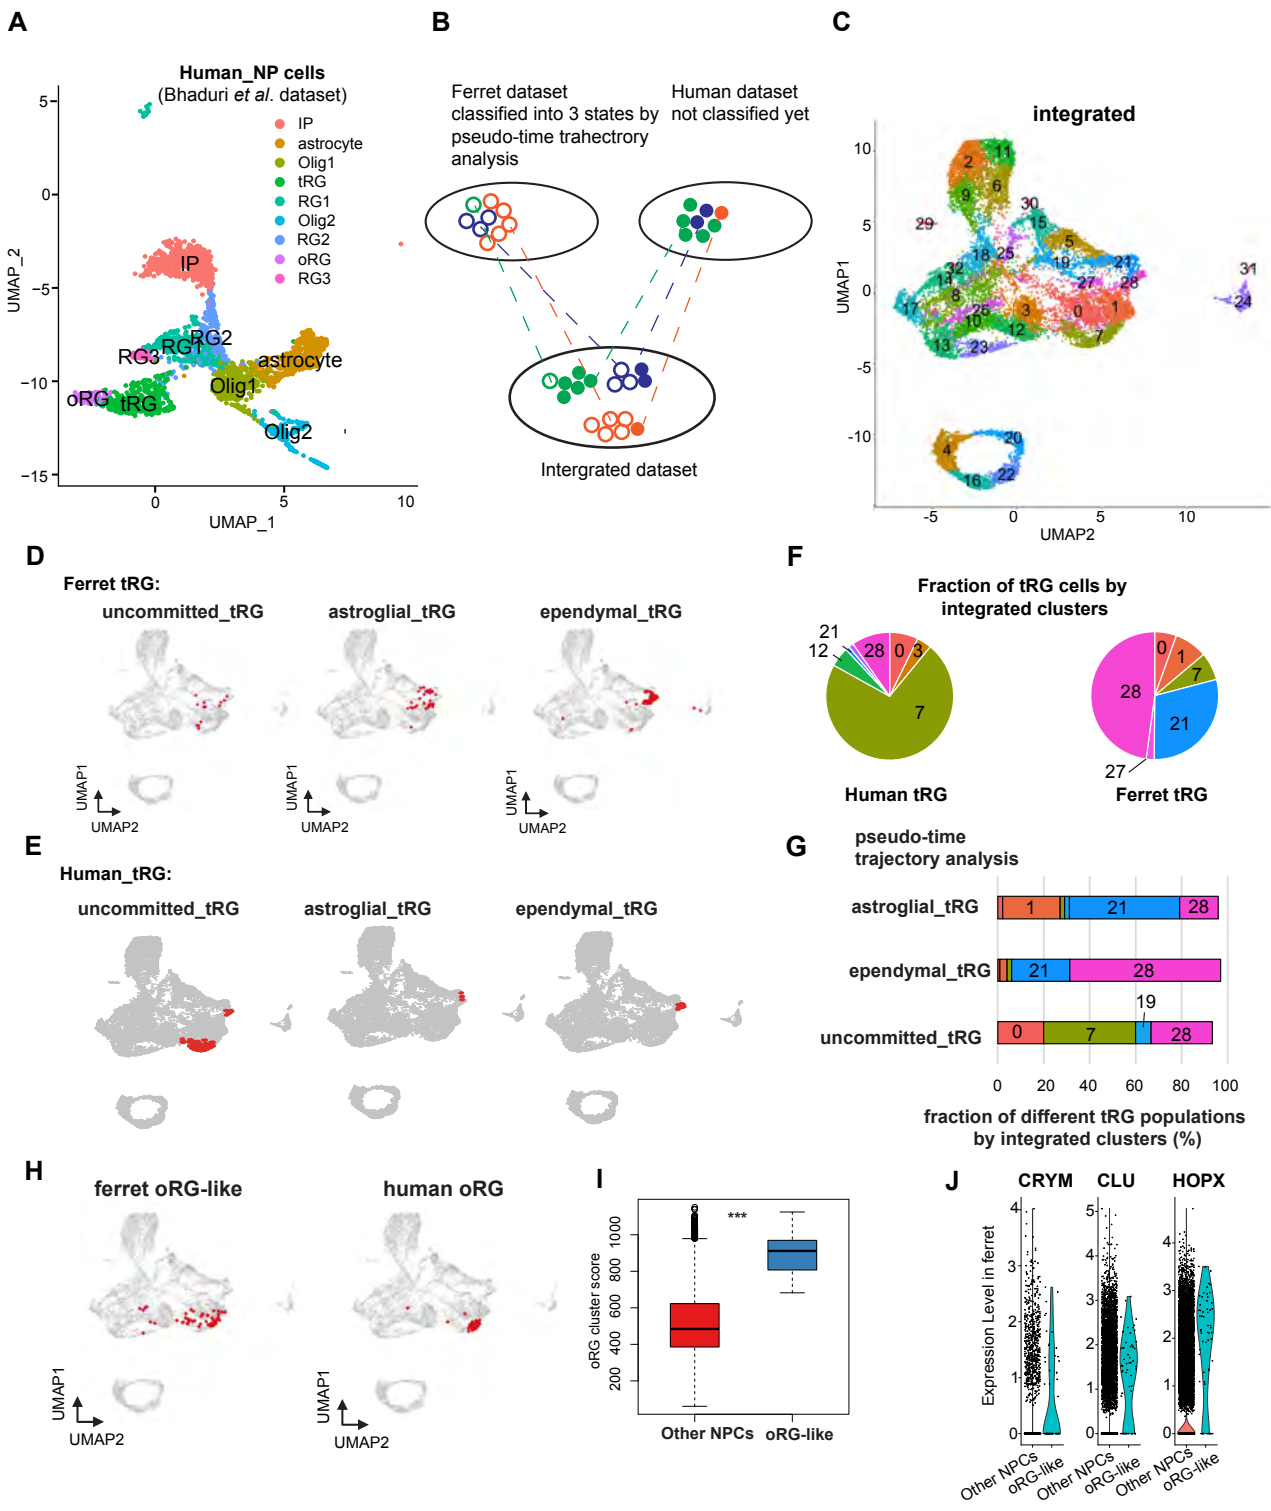

**Figure S6 . Comparison of differential tRG states between ferret and human.**

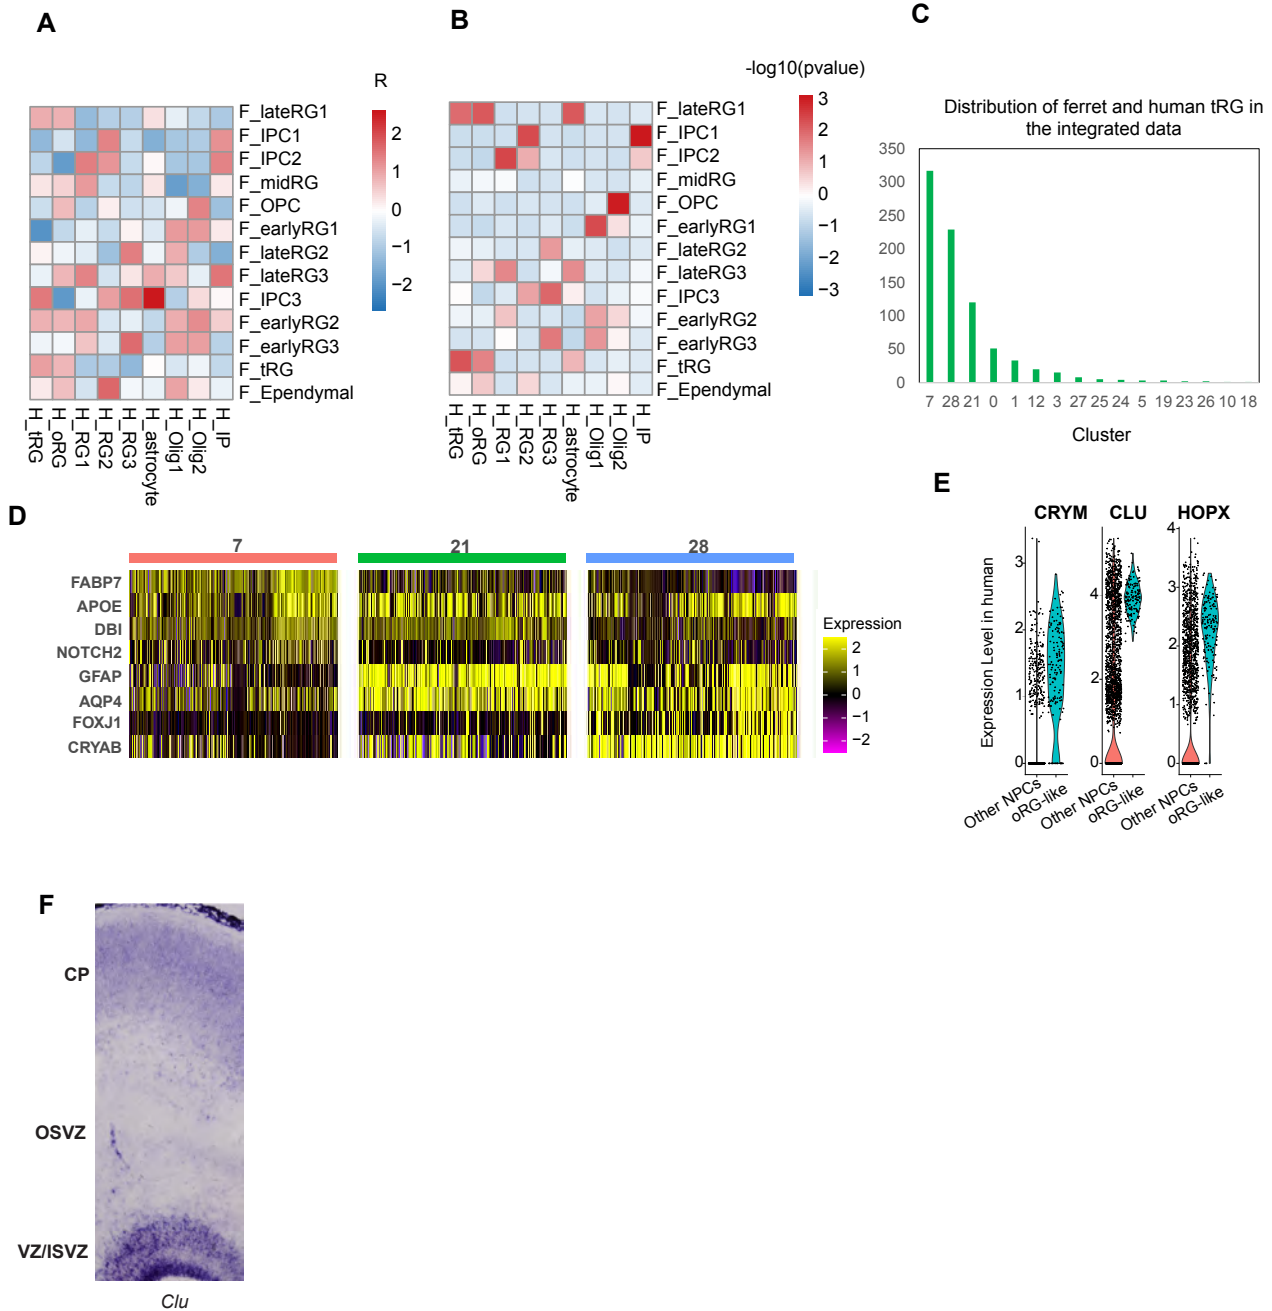

Source: https://www.biorxiv.org/content/10.1101/2022.05.05.490846v1.full.pdf
